# Supplementary material for: Costs and effects of higher turnover of nurses and Aboriginal health practitioners and higher use of short-term nurses in remote Australian primary care services: an observational cohort study
Source: PubMed Central journal article supplement — BMJ Open. 2019 Feb 20;9(2):e023906. doi: 10.1136/bmjopen-2018-023906 (PMC6398713; doi:10.1136/bmjopen-2018-023906), 2019-02-20
Supplement: bmjopen-2018-023906.draft_revisions.pdf [file bmjopen-2018-023906.draft_revisions.pdf]

# BMJ Open

BMJ Open is committed to open peer review. As part of this commitment we make the peer review history of every article we publish publicly available.

When an article is published we post the peer reviewers' comments and the authors' responses online. We also post the versions of the paper that were used during peer review. These are the versions that the peer review comments apply to.

The versions of the paper that follow are the versions that were submitted during the peer review process. They are not the versions of record or the final published versions. They should not be cited or distributed as the published version of this manuscript.

BMJ Open is an open access journal and the full, final, typeset and author-corrected version of record of the manuscript is available on our site with no access controls, subscription charges or pay-per-view fees (<http://bmjopen.bmj.com>).

If you have any questions on BMJ Open's open peer review process please email [info.bmjopen@bmj.com](mailto:info.bmjopen@bmj.com)

# BMJ Open

## The impacts of higher turnover and higher use of short-term staff on the cost-effectiveness of remote Australian primary care services

|                               |                                                                                                                                                                                                                                                                                                                                                                                                                                                                                                                                                                 |
|-------------------------------|-----------------------------------------------------------------------------------------------------------------------------------------------------------------------------------------------------------------------------------------------------------------------------------------------------------------------------------------------------------------------------------------------------------------------------------------------------------------------------------------------------------------------------------------------------------------|
| Journal:                      | <i>BMJ Open</i>                                                                                                                                                                                                                                                                                                                                                                                                                                                                                                                                                 |
| Manuscript ID                 | bmjopen-2018-023906                                                                                                                                                                                                                                                                                                                                                                                                                                                                                                                                             |
| Article Type:                 | Research                                                                                                                                                                                                                                                                                                                                                                                                                                                                                                                                                        |
| Date Submitted by the Author: | 30-Apr-2018                                                                                                                                                                                                                                                                                                                                                                                                                                                                                                                                                     |
| Complete List of Authors:     | Zhao, Yuejen; Health Gains Planning, Department of Health<br>Russell, Deborah; Flinders University, College of Medicine and Public Health<br>Guthridge, Steven; Menzies School of Health Research, Child Development,<br>Population Health and Policy<br>Ramjan, Mark; Northern Territory Department of Health<br>Jones, Michael; Macquarie University, Psychology Department<br>Humphreys, John; Monash University, School of Rural Health<br>Wakerman, John; A Joint Centre of Flinders University and Charles Darwin<br>University, Centre for Remote Health |
| Keywords:                     | HEALTH ECONOMICS, Health economics < HEALTH SERVICES<br>ADMINISTRATION & MANAGEMENT, Health policy < HEALTH SERVICES<br>ADMINISTRATION & MANAGEMENT, Human resource management <<br>HEALTH SERVICES ADMINISTRATION & MANAGEMENT                                                                                                                                                                                                                                                                                                                                 |
|                               |                                                                                                                                                                                                                                                                                                                                                                                                                                                                                                                                                                 |

SCHOLARONE™  
Manuscripts

Only

1  
2  
3  
4 **1 The impacts of higher turnover and higher use of short-term staff on**  
5 **2 the cost-effectiveness of remote Australian primary care services**

6  
7 **3 AUTHORS and AFFILIATIONS:**  
8

9 **4 Yuejen Zhao**

10 Department of Health, PO Box 40596, Darwin, NT 0800, Australia

11  
12  
13 yuejen.zhao@nt.gov.au  
14  
15

16  
17  
18 **8 Deborah J Russell,<sup>1</sup>**

19 Flinders Northern Territory, PO Box 666, Bendigo, Victoria 3552, Australia

20  
21  
22 deborah.russell@monash.edu  
23  
24

25  
26 **12 Steven Guthridge,**

27  
28  
29 Child Development, Population Health and Policy, Menzies School of Health Research, PO Box  
30 41096, Casuarina, NT 0811, Australia

31  
32 steve.guthridge@menzies.edu.au  
33  
34

35  
36 **17 Mark Ramjan,**

37  
38 Department of Health, PO Box 40596, Darwin, NT 0800, Australia

39  
40 mark.ramjan@nt.gov.au  
41  
42

43  
44 **21 Michael P Jones,**

45  
46 Faculty of Human Sciences, Macquarie University, North Ryde, NSW 2109, Australia

47  
48 mike.jones@mq.edu.au  
49  
50

51  
52  
53  
54 **26 John S Humphreys,**  
55  
56  
57

1  
2  
3 27 Monash Rural Health, Monash University, PO Box 91, Strathdale, Victoria 3550, Australia

4  
5 28 john.humphreys@monash.edu

6  
7 29

8  
9 30 **John Wakerman,**

10  
11 31 Centre for Remote Health, PO Box 4066, Alice Springs, NT 0871

12  
13 32 john.wakerman@flinders.edu.au

14  
15 33

16  
17 34

18 35 <sup>1</sup> Corresponding author

19  
20 36

21  
22 37

23 38 **Word count**

24  
25 39 2653

26  
27 40

28  
29 41

30  
31 42

32  
33 43

34  
35 44

36  
37 45

38  
39 46

40  
41 47

42  
43 48

44  
45 49

46  
47 50

48  
49 51

50  
51 52

52  
53 53

54  
55 54

56  
57 55

58  
59 56

60  
57

1  
2  
3 58 **Abstract**  
4  
5

6 59  
7  
8 60 **Objectives:**  
9

10 61 To compare the cost-effectiveness of:

11  
12  
13 62 i. higher with lower turnover of resident nurses and Aboriginal Health Practitioners; and

14  
15 63 ii. higher with lower use of agency-employed nurses;

16  
17  
18 64 and quantify associations between health care costs and staffing patterns in remote Northern  
19  
20 65 Territory community primary care clinics.  
21  
22

23 66 **Design:**  
24

25 67 Observational cohort study, using hospital admission, financial, and payroll data for the period  
26  
27 68 2013-2015  
28  
29

30 69 **Setting:**  
31

32  
33 70 53 Northern Territory Government (Australia) run primary care clinics in remote communities  
34  
35

36 71 **Outcome measures:**  
37

38 72 Incremental cost-effectiveness ratios were calculated for i. higher compared with lower turnover;  
39  
40 73 and ii. higher compared with lower use of agency-employed nurses. Costs comprised primary  
41  
42 74 care, travel, and hospitalisation costs. Effectiveness measures were i. total hospitalisations and  
43  
44 75 ii. years of life lost per 1000 person-months. Multiple regression was performed to investigate  
45  
46 76 associations between overall costs and turnover rates and use of agency-employed nurses,  
47  
48 77 after adjusting for key confounders.  
49  
50

51 78 **Results:**  
52  
53  
54  
55  
56  
57  
58  
59  
60

1  
2  
3 79 Higher turnover was associated with significantly higher hospitalisation rates ( $p<.001$ ) and  
4  
5 80 higher average health costs ( $p=.002$ ) than lower turnover. Lower turnover was always more  
6  
7 81 cost-effective.  
8

9  
10 82 Average costs were significantly ( $p<.001$ ) higher when higher proportions of agency-employed  
11  
12 83 nurses were employed. The probability that lower use of agency-employed nurses was more  
13  
14 84 cost-effective was 0.85.  
15

16  
17 85 Halving turnover and reducing use of a short-term workforce has the potential to save \$32  
18  
19 86 million annually in the Northern Territory.  
20

## 21 87 **Conclusion**

22  
23  
24 88 High turnover of health staff is costly and associated with poorer health outcomes for Aboriginal  
25  
26 89 peoples living in remote communities. High reliance on agency nurses is also very likely to be  
27  
28 90 cost-*ineffective*. Investment in a coordinated range of workforce strategies that support  
29  
30 91 recruitment and retention of resident nurses and Aboriginal Health Practitioners in remote clinics  
31  
32 92 is needed to stabilise the workforce and thereby significantly reduce expenditure and improve  
33  
34 93 health outcomes.  
35  
36

37 94

## 38 39 40 95 **Keywords**

41  
42 96 Remote health, Health workforce, Turnover, Remote area nurse, Aboriginal Health Practitioner,  
43  
44 97 Fly-in fly-out, Remote health services, Health manpower, Indigenous health  
45  
46

47 98

48 99

## 100 **Article Summary**

### 101 **Strengths and limitations of this study**

- 102 • Data are for an entire population - remote living residents in communities serviced by  
103 Northern Territory Department of Health;
- 104 • Primary and secondary care data are linked;
- 105 • Univariate analyses (calculation of Incremental Cost-effectiveness Ratios) are  
106 complemented by multiple regression analyses which adjust for key potential  
107 confounders;
- 108 • Sensitivity analyses were undertaken to test for possible differences in costs and in  
109 effectiveness that may be related to hospital admissions for dialysis and demographic  
110 composition of communities (predominantly non-Indigenous or not);
- 111 • Effectiveness of primary care used proxy measures (hospitalisation rates; years of life  
112 lost rates) which may not necessarily best reflect effectiveness of primary care.

## 115 **Introduction**

116 There is an urgent need for high quality primary care (PC) services for disadvantaged Aboriginal  
117 and Torres Strait Islander populations (referred to as Aboriginal hereafter) in remote  
118 communities of Australia if we are to 'close the gap' in health outcome inequalities. Australian  
119 Aboriginal peoples have higher levels of risk factors for many communicable and non-  
120 communicable diseases and experience higher rates of complex acute and chronic diseases  
121 such as infectious diseases, ischaemic heart disease, diabetes and chronic kidney disease  
122 compared to non-Aboriginal Australians.(1-4) Recent research shows that higher utilisation of  
123 PC services by Aboriginal people with chronic diseases is cost-effective.(5, 6) Access to, and  
124 utilisation of, effective PC, however, may be compromised in remote Northern Territory (NT)

1  
2  
3 125 communities by extremely high turnover rates of resident clinical staff and heavy reliance on  
4  
5 126 short-term agency nurses.(7-9) Primary care costs per person rise as geographical remoteness  
6  
7 127 of communities increases and population size decreases.(10-12) A large proportion of these  
8  
9 128 costs relates to higher staffing costs, and costs associated with staff and patients traveling long  
10  
11 129 distances.(10, 13) Workforce shortages and extremely high staff turnover (averaging 148% per  
12  
13 130 annum for nurses) result in 42% of NT remote area nurses being employed on relatively  
14  
15 131 expensive casual or agency contracts.(7, 10, 12, 14)

16  
17  
18 132 There is a lack of published quantitative evidence, however, of the costs, effectiveness, and  
19  
20 133 cost-effectiveness of different staffing patterns.(15) The aims of this research, therefore, are  
21  
22 134 threefold: first, to compare the cost-effectiveness of higher turnover of resident remote area  
23  
24 135 nurses or midwives (nurses) and Aboriginal Health Practitioners (AHPs) with lower turnover;  
25  
26 136 second, to compare the cost-effectiveness of proportionally higher use of agency-employed  
27  
28 137 nurses with lower use of agency-employed nurses; and, third, to quantify the effects of nurse  
29  
30 138 and AHP turnover and use of agency-employed nurses on health care costs, after adjusting for  
31  
32 139 known confounders.

## 33 34 35 36 140 **Methods**

### 37 38 39 141 **Study setting**

40  
41  
42 142 The study sites were 53 NT Department of Health (DOH) remote health clinics in 46  
43  
44 143 predominantly Aboriginal communities and 7 non-Indigenous towns where resident nurses,  
45  
46 144 AHPs, and Aboriginal community workers provide most clinical PC services.(7) Temporary and  
47  
48 145 ongoing nursing and AHP vacancies were filled by DOH employed casual nurses, DOH  
49  
50 146 employed agency nurses or, as the least preferred, most expensive alternative, by agency-  
51  
52 147 employed nurses (nurses paid directly by nurse employment agencies). In this study the  
53  
54  
55  
56  
57  
58  
59  
60



148 proportion of agency-employed nurses was used as a marker of overall use of short-term  
149 nurses.

## 150 **Patient involvement**

151 This study comprised analysis of NT DOH secondary data and patients were not involved.

## 153 **Data**

154 Four NT DOH datasets were used: the Primary Care Information Systems (PCIS), Hospital  
155 Inpatients Activity (HIA), Government Accounting System (GAS) and Personnel Information and  
156 Payroll Systems (PIPS). The study period was 2013-2015, as this was the most recent period  
157 for which the required costs, effectiveness and workforce turnover data were available.(7)  
158 PIPS data were used to calculate monthly turnover rates of nurses and AHPs in each month in  
159 each clinic:

$$160 \text{ Turnover rate} = \frac{\text{number of exits}}{\text{average number employed}} \times 100$$

161 An exit was defined when a staff member ceased working at a specific remote clinic for a period  
162 of at least 12 weeks. A cut-off of 10% differentiated higher ( $\geq 10\%$ ) from lower ( $< 10\%$ ) turnover,  
163 equating to 120% annual turnover. Previous research showed that the average annual turnover  
164 rate of nurses and AHPs in these remote NT clinics is 128%.(16)

165 GAS data were used to calculate PC costs in Australian dollars per month for each remote  
166 clinic. PC clinic costs comprised operational and personnel expenditures and excluded capital  
167 expenses.(12) Agency-employed nurse labour expenses were used to derive estimates of  
168 aggregated full-time equivalent (FTE) agency-employed nurses working in remote clinics each  
169 month using a standard NT DOH formula:

$$170 \text{ Agency-employed nurse FTE} = \frac{\text{Agency-employed nurse labour expenses}}{2 \times \text{average DOH-employed nurse cost}} \quad (17)$$

1  
2  
3 171 Percentage use of agency-employed nurses at each clinic each month was calculated:  
4

5  
6 172 Percentage of agency-employed nurses =  $\frac{\text{Agency-employed nurse FTE}}{\text{Total FTE nurse positions}} \times 100$   
7

8  
9 173 A cut-off of 10% differentiated higher ( $\geq 10\%$ ) from lower ( $< 10\%$ ) use of agency-employed  
10  
11 174 nurses. Previous research showed that FTE agency-employed nurses filled, on average, 13% of  
12  
13 175 nurse positions.(7)  
14

15  
16 176 PCIS data were used to determine the number of PC consultations in each clinic each month.  
17

18 177 Population catchments (service populations) for each remote clinic were defined as the number  
19  
20 178 of unique patients recorded in PCIS in the previous 12 months.  
21

22  
23 179 HIA data were used to determine the community in which each patient lived at the time of  
24  
25 180 hospital admission, to calculate the number of hospitalisations for each clinic each month, and  
26  
27 181 to estimate hospitalisation costs using information on diagnoses (Australian Refined Diagnosis-  
28  
29 182 Related Group (DRG) codes) provided in discharge summaries: (18)  
30

31  
32 183 Hospitalisation costs =  $DRG \text{ cost weight} \times NT \text{ benchmark prices}$  .  
33

34 184 Both HIA and PCIS data were used to determine age at death, from which Years of Life Lost  
35  
36 185 (YLLs) were calculated using an age specific life expectancy table used in the Australian Burden  
37  
38 186 of Disease study.(2)  
39

40  
41 187 Both GAS and PCIS data were used to estimate PC costs each month in each clinic, calculated  
42  
43 188 by first deriving an average consultation cost which was the overall estimated expenditure of the  
44  
45 189 clinic each year divided by the total occasions of service in that year. PC costs per person per  
46  
47 190 month were calculated as the average consultation cost multiplied by the number of  
48  
49 191 consultations per person-month. Travel costs were calculated by doubling the straight line  
50  
51 192 distance between the resident community and nearest hospital, based on a flat rate of \$2 per  
52  
53 193 kilometre.(19)  
54  
55  
56  
57  
58  
59  
60

## 194 **Analyses**

195 Two separate cost-effectiveness analyses were undertaken. In the first analysis (denoted in  
 196 equations by subscript 1) comparison of costs and effects were according to whether clinic-  
 197 months had higher or lower turnover rates, whereas in the second analysis comparisons were  
 198 by whether clinic-months had higher or lower use of agency-employed nurses.

199 Effects for the respective analyses were calculated as follows:

$$200 \quad \text{Effect}_1 = \frac{\text{Total number of hospitalisations}}{\text{Total number of person-months}} \times 1000 ;$$

$$201 \quad \text{Effect}_2 = \frac{\text{Total number of YLLs}}{\text{Total number of person-months}} \times 1000 .$$

202 Total hospitalisation and YLLs rates were used as these measures of benefit in the evaluation  
 203 were accessible and, having previously been reported in the peer-reviewed cost-effectiveness  
 204 extant literature in the remote Australian context, were known to be acceptable proxy measures  
 205 for the effectiveness of primary care.(5, 6)

206 Costs for the respective analyses were calculated as follows:

$$207 \quad \text{Costs}_{1,2} = \frac{\text{PC} + \text{Travel} + \text{Hospitalisation costs}}{\text{Total number of person-months}} \times 1000.$$

208 Costs and effects were measured for each person-month using current expenditure and health  
 209 care data within the short study timeframe. No future costs and health outcomes were  
 210 considered, nor was discounting considered necessary in this study. The incremental cost-  
 211 effectiveness ratio (ICER) for the first analysis was calculated as the difference in average  
 212 health costs per 1000 person-months divided by the difference in effects (hospitalisation rates)  
 213 per 1000 person-months:

$$214 \quad \text{ICER}_1 = \frac{\text{Costs in high turnover clinic months} - \text{Costs in lower turnover clinic months}}{\text{Effects in high turnover clinic months} - \text{Effects in lower turnover clinic months}}$$

1  
2  
3 215 The ICER for the second analysis was calculated as the difference in average health costs per  
4  
5 216 1000 person-months, divided by the difference in effects (YLLs) per 1000 person-months:

6  
7  
8 217 
$$\text{ICER}_2 = \frac{\text{Costs in higher use of agency employed nurses clinic months} - \text{Costs in lower use of agency employed nurses clinic months}}{\text{Effects in higher use of agency employed nurses clinic months} - \text{Effects in lower use of agency employed nurses clinic months}}$$
  
9

10  
11 218 Overall hospitalisation rates and YLLs rates were proxies for PC effectiveness in the first and  
12  
13 219 second analyses, respectively. In both analyses the perspective of the NT Government was  
14  
15 220 used to identify relevant costs incurred, which included PC, travel, and hospitalisation costs per  
16  
17 221 1000 person-months. A 'top down' approach was used to allocate total remote health  
18  
19 222 expenditure to each clinic, as described elsewhere.(12) All costs were based on actual  
20  
21 223 expenditure.

22  
23  
24 224 In addition to calculating ICER point estimates, 2000 Bootstrap replicates were used to plot  
25  
26 225 cost-effectiveness planes (mean differences in the cost and effect pairs) and to construct cost-  
27  
28 226 effectiveness acceptability curves (probability that lower turnover or lower proportional use of  
29  
30 227 agency-employed nurses is cost-effective) to investigate uncertainty. Calculations of ICER also  
31  
32 228 included two sensitivity analyses, to examine costs and effects if:

33  
34  
35 229 (1) clinics servicing predominantly non-Aboriginal communities were excluded; and

36  
37  
38 230 (2) hospitalisations for renal dialysis were excluded.

39  
40 231 The average NT cost per hospitalisation of \$4,213 was used as the benchmark price for a  
41  
42 232 hospitalisation.(18) A threshold of \$120,000 was used as the benchmark price for a YLL.(20)

43  
44  
45 233 Multiple regression was used to investigate associations between overall costs and nurse and  
46  
47 234 AHP turnover rates and proportional use of agency-employed nurses, after adjusting for key  
48  
49 235 confounders. Potential confounders included Euclidean distance to the nearest hospital, PC  
50  
51 236 consultation rates, and hospitalisation rates (both total and potentially preventable).

52  
53  
54 237 StataSE v14 was used for all analyses. A .05 level of statistical significance was used.  
55  
56  
57

1  
2  
3 238 **Ethics**  
4

5  
6 239 Ethics approval was received from the Human Research Ethics Committee of the NT DOH and  
7  
8 240 Menzies School of Health Research (2015-2363).  
9

10  
11 241 **Results**  
12  
13

14 242 Between 2013 and 2015 there were 1,266,708 person-months, 46,276 hospital admissions,  
15  
16 243 2,058,829 PC consultations, and a service population of approximately 35,000 persons. Total  
17  
18 244 health costs were \$603 million and there were 530 deaths with an estimated 17,750 YLLs.  
19

20  
21 245 **1. Higher versus lower turnover**  
22

23 246 Remote clinic-months with lower staff turnover have both significantly lower hospitalisation rates  
24  
25 247 ( $p<.001$ ) and lower average health cost rates ( $p=.002$ ) than higher staff turnover clinic-months.  
26  
27 248 (Table 1) Sensitivity analyses confirmed these results.  
28

29 249 Lower turnover was always associated with reduced hospitalisation rates and, in almost all  
30  
31 250 instances, with savings in average health care costs compared to higher turnover. (Figure 1)  
32  
33 251 PC was cost-effective with ICER being \$1,708 per hospitalisation (savings in both numerator  
34  
35 252 and denominator). At the current NT threshold of \$4,213 per hospitalisation, the probability of  
36  
37 253 lower turnover being more cost-effective is 1. (Figure 2)  
38  
39

40 254  
41  
42  
43  
44  
45  
46  
47  
48  
49  
50  
51  
52  
53  
54  
55  
56  
57  
58  
59  
60

255 **Table 1. Average health costs, hospitalisations, and incremental cost-effectiveness ratio**  
 256 **for higher and lower staff turnover months, 2013-15**

|                                                       |                                       | Total     | Sensitivity analysis 1:<br>Excluding<br>predominantly non-<br>Aboriginal<br>communities | Sensitivity analysis 2:<br>Excluding<br>hospitalisations for<br>renal dialysis |
|-------------------------------------------------------|---------------------------------------|-----------|-----------------------------------------------------------------------------------------|--------------------------------------------------------------------------------|
| n (person-months)                                     | High monthly turnover ( $\geq 10\%$ ) | 229,968   | 193,328                                                                                 | 229,968                                                                        |
|                                                       | Low monthly turnover ( $< 10\%$ )     | 1,036,740 | 878,406                                                                                 | 1,036,740                                                                      |
| Hospitalisations<br>(per 1000 person-<br>months)      | High monthly turnover ( $\geq 10\%$ ) | 45.3      | 51.7                                                                                    | 17.8                                                                           |
|                                                       | Low monthly turnover ( $< 10\%$ )     | 34.6      | 38.4                                                                                    | 16.0                                                                           |
|                                                       | <i>p</i> -value                       | $< .001$  | $< .001$                                                                                | $< .001$                                                                       |
| Average health cost (\$) (per 1000 person-<br>months) | High monthly turnover ( $\geq 10\%$ ) | \$491,043 | \$531,865                                                                               | \$446,344                                                                      |
|                                                       | Low monthly turnover ( $< 10\%$ )     | \$472,826 | \$511,977                                                                               | \$440,355                                                                      |
|                                                       | <i>p</i> -value                       | .002      | .003                                                                                    | .271                                                                           |
| Incremental cost-effectiveness ratio                  |                                       | \$1,708   | \$1,500                                                                                 | \$3,365                                                                        |

257

258

## 259 **2. Higher versus lower proportional use of agency-employed staff**

260 Remote clinic-months with higher proportional use of agency-employed nurses have both a  
 261 significantly higher average health cost rate ( $p < .001$ ) and higher YLLs rate ( $p < .001$ ) than clinic-  
 262 months with lower use. (Table 2) Both sensitivity analyses confirmed decreased effectiveness of  
 263 higher proportional use of agency-employed nurses. In remote Aboriginal communities,  
 264 however, only overall costs were higher in clinic-months that had proportionally lower use of  
 265 agency-employed nurses.

266 Lower proportional use of agency nurses was always associated with health cost savings  
 267 though less strongly associated with fewer YLLs. (Figure 3) At the threshold value of \$120,000  
 268 per YLL, the probability of lower use of agency-employed nurses being more cost-effective was  
 269 0.849. (Figure 4)

270

271

272 **Table 2. Average health costs, years of life lost, and incremental cost-effectiveness ratio**  
 273 **for higher and lower proportional use of agency-employed nurses, 2013-15**

|                                                          |                                              | Total     | Sensitivity analysis 1:<br>Excluding<br>predominantly<br>non-Aboriginal<br>communities | Sensitivity analysis 2:<br>Excluding<br>hospitalisations for<br>renal dialysis |
|----------------------------------------------------------|----------------------------------------------|-----------|----------------------------------------------------------------------------------------|--------------------------------------------------------------------------------|
| n (person-months)                                        | High agency nurse proportion ( $\geq 10\%$ ) | 813,284   | 727,488                                                                                | 813,284                                                                        |
|                                                          | Low agency nurse proportion ( $< 10\%$ )     | 453,424   | 344,246                                                                                | 453,424                                                                        |
| YLL<br>(per 1000 person-<br>months)                      | High agency nurse proportion ( $\geq 10\%$ ) | 14.4      | 13.5                                                                                   | 14.4                                                                           |
|                                                          | Low agency nurse proportion ( $< 10\%$ )     | 13.3      | 12.9                                                                                   | 13.3                                                                           |
|                                                          | <i>p</i> -value                              | $< .001$  | .005                                                                                   | $< .001$                                                                       |
| Average health cost (\$)<br>(per 1000 person-<br>months) | High agency nurse proportion ( $\geq 10\%$ ) | \$486,195 | \$512,609                                                                              | \$451,422                                                                      |
|                                                          | Low agency nurse proportion ( $< 10\%$ )     | \$458,086 | \$521,809                                                                              | \$423,543                                                                      |
|                                                          | <i>p</i> -value                              | $< .001$  | $< .001$                                                                               | $< .001$                                                                       |
| ICER                                                     |                                              | \$23,847  | -\$13,837                                                                              | \$23,652                                                                       |

274

### 275 3. Multiple regression modelling of overall cost rates

276 Overall health cost rates are significantly associated with hospitalisations, potentially  
 277 preventable hospitalisations, PC consultations, turnover, use of agency-employed nurses, and  
 278 distance to nearest hospital. (Table 3) Each 10% increase in annual turnover is associated with  
 279 an increased cost of \$11 per person-month. For each 10% increase in proportion of agency-  
 280 employed nurses used, there is an associated increase in cost of \$10 per person-month. One  
 281 preventable hospitalisation is associated with an increased cost of \$10,063, which is in addition  
 282 to the costs of a normal hospitalisation. Sensitivity analyses (not shown) revealed similar  
 283 coefficient estimates.

284 Assuming a service population of 35,000 residents, reducing turnover from 120% per annum to  
 285 60% and no longer using agency-employed nurses (reducing from 13% to 0%) results in  
 286 potential savings of \$32 million annually in PC, hospitalisations, and travel costs.

287

288 **Table 3. Multiple linear regression model predicting total health costs per person-month**

|                                                   | Coefficient | 95% CI Lower limit | 95% CI Upper limit |
|---------------------------------------------------|-------------|--------------------|--------------------|
| Number of hospitalisations                        | 2591**      | 2584               | 2598               |
| 10% increase in nurse and AHP annual turnover     | 11**        | 7                  | 15                 |
| 10% increase in proportional use of agency nurses | 10**        | 8                  | 11                 |
| Potentially preventable hospitalisations          | 10063**     | 10001              | 10126              |
| Euclidian distance to hospital (km)               | 0.16**      | 0.14               | 0.17               |
| Number of Primary Care consultations              | 170**       | 169                | 171                |

289 \*\*  $p < .001$ ; AHP Aboriginal Health Practitioners; CI Confidence interval.

290

## 291 Discussion

292 This landmark empirical study shows that lower nurse and AHP turnover is associated with  
 293 significantly lower hospitalisations ( $p < .001$ ), lower average health cost rates ( $p = .002$ ), and is  
 294 consistently more cost-effective than higher turnover. The potential savings in health care costs  
 295 of reducing staff turnover are in the order of \$32 million annually. Also, lower use of short-term  
 296 agency nurses has an 85% likelihood of being more cost-effective than higher use. These  
 297 important findings for policymakers and health service managers suggest that effective  
 298 investments in workforce strategies that reduce turnover rates and decrease reliance on short-  
 299 term agency nurses may have very significant net benefits, both to the health services' budgets  
 300 as well as to longer term health outcomes for disadvantaged Aboriginal populations.

301 This research highlights a pressing need to invest in the systematic implementation of a co-  
 302 ordinated range of short and longer term remote workforce strategies in order to stabilise the  
 303 workforce, improve continuity of care, and thereby improve health outcomes. Whilst our



1  
2  
3 304 knowledge about the effectiveness of various PC workforce retention interventions is incomplete

4  
5 305 (21), available evidence suggests that effective short-term retention strategies include:

6  
7  
8 306 • Ensuring necessary infrastructure, including adequate housing, vehicle, and communication  
9  
10 307 technologies;

11  
12 308 • Offering realistic remuneration, including salary packaging and retention bonuses;

13  
14  
15 309 • Ensuring organisational effectiveness by (i) strengthening health service and clinic  
16  
17 310 management and leadership, (ii) ensuring comprehensive staff orientation and induction,  
18  
19 311 and (iii) maintaining a professional environment through mentoring, ongoing professional  
20  
21 312 development, and promoting scholarship;

22  
23  
24 313 • Providing appropriate personal and family support for employees; and

25  
26  
27 314 • Implementing alternative workforce models that are more likely to ensure continuity of care,  
28  
29 315 such as employing nurses to work one month on, one month off in shared positions.

30  
31  
32 316 Longer-term retention strategies may include:

33  
34 317 • Providing sufficient funding (22, 23) to ensure an adequate supply of remote health  
35  
36 318 professionals relative to population needs without undue reliance on short-term staff;

37  
38  
39 319 • Increased recruitment of, and support for, Aboriginal people into clinical and non-clinical  
40  
41 320 roles. Training models which enable training of AHPs to be largely based in remote  
42  
43 321 communities may be effective;

44  
45  
46 322 • Based on lessons learnt from the integrated rural medical training pathway, building  
47  
48 323 appropriate training pathways for remote area nurses in partnership with local educational  
49  
50 324 institutions, with a particular focus on appropriate student selection, a contextualised  
51  
52 325 program, and a supported post-graduate employment pathway. This is likely to result in a  
53  
54 326 better prepared and more stable nursing workforce;

- 1  
2  
3 327 • Transitioning governance arrangements from NT Government-run to Aboriginal community  
4  
5 328 control. While it is not known whether community-control of health services is associated  
6  
7 329 with lower health workforce turnover and lower use of short-term agency nurses, we do  
8  
9 330 know that Aboriginal Community Controlled Health Services (ACCHSs) employ a high  
10  
11 331 proportion of Aboriginal staff (24), and that family connections (25) and a sense of  
12  
13 332 ownership of the service (26) contribute to improved access. (27, 28)  
14  
15

16 333 This study is not without some limitations. Estimates of the effectiveness of PC used proxy  
17  
18 334 measures, which may not necessarily best reflect effectiveness of PC. Comparison groups for  
19  
20 335 cost-effectiveness analyses were also somewhat arbitrarily defined and it would have been  
21  
22 336 preferable to make comparisons on the basis of use of all agency nurses, not just of agency-  
23  
24 337 employed nurses. However, we were not able to accurately identify DOH-employed agency  
25  
26 338 nurses within the payroll data. Our cost estimates may also be imprecise, as they are  
27  
28 339 dependent on the quality of administrative data on expenditure recorded in GAS and on  
29  
30 340 consultation data recorded in PCIS. Our study also did not include effects of any policy  
31  
32 341 measures designed to reduce staff turnover, nor did it attempt to measure the costs of  
33  
34 342 introducing such policies. While the findings of our study are likely generalisable to other  
35  
36 343 primary care clinics in remote, predominantly Aboriginal communities in Australia, caution is  
37  
38 344 advised in generalising beyond these limits. This is an observational study comparing two  
39  
40 345 different situations (higher vs lower turnover; higher vs lower proportional use of agency-  
41  
42 346 employed nurses) using existing administrative data. It is indicative of two simple workforce  
43  
44 347 policy scenarios in which cost-effectiveness information is otherwise lacking. No evidence  
45  
46 348 synthesis and decision modelling were undertaken in this study.  
47  
48  
49

50 349 Despite its limitations, the findings of this research provide critically important evidence for  
51  
52 350 policymakers seeking to improve health outcomes for Aboriginal people living in remote  
53  
54 351 Australia while responsibly managing finite health budgets. There is great potential for more  
55  
56  
57  
58  
59  
60

352 cost-effective PC to be attained. This will require PC workforce turnover, retention, and use of  
353 short-term staff to be addressed as a priority.

## 354 **Conclusion**

355 Higher resident nurse and AHP turnover is costly and associated with poorer health outcomes  
356 for Aboriginal people. Halving the current annual turnover to 60% and reducing use of agency-  
357 employed nurses has the potential to reduce costs to the NT health system by \$32 million each  
358 year. Systemic investment in a range of co-ordinated workforce strategies is needed to stabilise  
359 the remote workforce, save money, improve Aboriginal health outcomes and 'close the gap'.

360

## 361 **List of Abbreviations**

362 ACCHS Aboriginal Community Controlled Health Service

363 AHPs Aboriginal Health Practitioners

364 DOH Department of Health

365 DRG Diagnosis-Related Group

366 FTE Full-time Equivalent

367 GAS Government Accounting System

368 HIA Hospital Inpatients Activity

369 ICER Incremental Cost-Effectiveness Ratio

370 NT Northern Territory

371 PC Primary Care

372 PCIS Primary Care Information Systems

1  
2  
3 373 PIPS Personnel Information and Payroll Systems  
4  
5

6 374 YLL Year of Life Lost  
7

8 375  
9

10 376  
11

## 12 13 377 **Declarations** 14 15

### 16 378 **Ethics approval**

17  
18 379 Ethics approval was received from the Human Research Ethics Committee of the Northern  
19  
20 380 Territory Department of Health and Menzies School of Health Research (2015-2363).  
21

### 22 381 **Original protocol for the study**

23  
24 382 The original protocol for the study is published and available (open access):  
25

26 383 Wakerman J, Humphreys JS, Bourke L, Dunbar T, Jones M, Carey T, et al. Assessing the  
27  
28 384 impact and cost of short-term health workforce in remote Indigenous communities in Australia: a  
29  
30 385 mixed methods study protocol. JMIR research protocols. 2016;5(4):e135.  
31  
32

### 33 386 **Funding**

34  
35 387 This work was supported by the Australian Research Council's *Discovery Projects* funding  
36  
37 388 scheme (project number DP150102227). The funder had no input in to the design, conduct and  
38  
39 389 reporting of this analysis.  
40

### 41 390 **Competing interests**

42  
43 391 The authors declare that they have no competing interests.  
44  
45

### 46 392 **Data sharing statement**

47  
48 393 The datasets generated and analysed during the current study are not publicly available due to  
49  
50 394 identifiability of remote primary care providers and the need to protect their privacy.  
51

52 395  
53  
54  
55  
56  
57  
58  
59  
60

1  
2  
3 396 **Author contributions**

4 397 This research was conceived by JW, JH, SG, YZ and MJ. YZ led the analysis. All authors  
5  
6 398 contributed to the planning and coordination of the study, interpretation of the data and drafting  
7  
8  
9 399 of the manuscript. All authors read and approved the final manuscript.

10  
11 400 **Acknowledgements**

12 401 We wish to thank Steve Kyriacou and Barnie Kyriacou, who provided technical assistance in  
13  
14 402 accessing and interpreting Departmental data. We would also like to acknowledge and sincerely  
15  
16 403 thank all staff working in the 53 remote NT communities, particularly the clinic managers.  
17  
18 404 Finally, we would like to acknowledge the contributions of Terry Dunbar, David Lyle, Lisa  
19  
20 405 Bourke, Tim Carey and Lorna Murakami-Gold to the bigger, overarching research project,  
21  
22 406 especially for the qualitative research which helped inform our understanding of these  
23  
24 407 quantitative data and for comments provided which strengthened this manuscript.  
25  
26  
27

28 408

29 409

30 410  
31  
32  
33  
34  
35  
36  
37  
38  
39  
40  
41  
42  
43  
44  
45  
46  
47  
48  
49  
50  
51  
52  
53  
54  
55  
56  
57  
58  
59  
60

411 **References**

- 412
- 413 1. Australian Institute of Health and Welfare. The health and welfare of Australia's Aboriginal  
414 and Torres Strait Islander peoples 2015. Cat. no. IHW 147. Canberra: AIHW; 2015.
- 415 2. Australian Institute of Health and Welfare. Australian Burden of Disease Study: fatal burden  
416 of disease in Aboriginal and Torres Strait Islander people 2010. Australian Burden of Disease  
417 Study series no. 2. Cat. no. BOD 2. Canberra: AIHW; 2015.
- 418 3. Zhao YJ, Guthridge S, Magnus A, Vos T. Burden of disease and injury in Aboriginal and  
419 non-Aboriginal populations in the Northern Territory. *Med J Aust.* 2004;180(10):498-502.
- 420 4. Vos T, Barker B, Begg S, et al. Burden of disease and injury in Aboriginal and Torres Strait  
421 Islander Peoples: the Indigenous health gap. *Int J Epidemiol.* 2009;38(2):470-7.
- 422 5. Thomas SL, Zhao Y, Guthridge SL, Wakerman J. The cost-effectiveness of primary care for  
423 Indigenous Australians with diabetes living in remote Northern Territory communities. *Med J*  
424 *Aust.* 2014;200(11):658-62.
- 425 6. Zhao Y, Thomas SL, Guthridge SL, Wakerman J. Better health outcomes at lower costs: the  
426 benefits of primary care utilisation for chronic disease management in remote Indigenous  
427 communities in Australia's Northern Territory. *BMC Health Serv Res.* 2014;14:463.
- 428 7. Russell DJ, Zhao Y, Guthridge S, et al. Patterns of resident health workforce turnover and  
429 retention in remote communities of the Northern Territory of Australia, 2013–2015. *Hum Resour*  
430 *Health.* 2017;15(1):52.
- 431 8. Zhao Y, Russell DJ, Guthridge S, et al. Long-term trends in supply and sustainability of the  
432 health workforce in remote Aboriginal communities in the Northern Territory of Australia. *BMC*  
433 *Health Serv Res.* 2017;17(1):836.
- 434 9. Burns CB, Clough AR, Currie BJ, et al. Resource requirements to develop a large, remote  
435 aboriginal health service: whose responsibility? *Aust N Z J Public Health.* 1998;22(1):133-9.
- 436 10. Zhao Y, Malyon R. Cost drivers of remote clinics: Remoteness and population size. *Aust*  
437 *Health Rev.* 2010;34(1):101-5.
- 438 11. Asthana S, Halliday J. What can rural agencies do to address the additional costs of rural  
439 services? A typology of rural service innovation. *Health Soc Care Community.* 2004;12(6):457-  
440 65.
- 441 12. Zhao Y, Guthridge S, Ramjan M, et al. The cost impact of high staff turnover on primary  
442 care in remote Australia. Under Review. 2017.
- 443 13. McGrath P, Holewa H, McGrath Z. Practical problems for Aboriginal palliative care service  
444 provision in rural and remote areas: equipment, power and travel issues. *Collegian.*  
445 2007;14(3):21-6.
- 446 14. Northern Territory Government Department of Health. Remote Area Nurse safety: On-call  
447 after hours security. Darwin: NT Department of Health; 2016.
- 448 15. Hayes LJ, O'Brien-Pallas L, Duffield C, et al. Nurse turnover: A literature review - An  
449 update. *Int J Nurs Stud.* 2012;49(7):887-905.
- 450 16. Russell DJ, Zhao Y, Guthridge S, et al. Patterns of Remote Area Nurse and Aboriginal  
451 Health Practitioner turnover and retention in remote communities of the Northern Territory of  
452 Australia, 2013-2015. *Human Resources for Health.* 2017;15:52.

- 1  
2  
3 453 17. Northern Territory Government Department of Health. Indicator definition: Full Time  
4 454 Equivalents v1.0. Darwin: NTG Department of Health; 2015.
- 5  
6 455 18. Independent Hospital Pricing Authority. National hospital cost data collection: Northern  
7 456 Territory 2014/15 Round 19. Sydney: IHPA; 2016.
- 8  
9 457 19. Zhao Y, Hanssens P, Byron P, Guthridge S. Cost estimates of primary health care  
10 458 activities for remote Aboriginal communities in the Northern Territory. Darwin: Northern Territory  
11 459 Department of Health and Community Services; 2006.
- 12 460 20. Australian Safety and Compensation Council. The health of nations: the value of a  
13 461 statistical life. Canberra: Commonwealth of Australia; 2008.
- 14  
15 462 21. Buykx P, Humphreys J, Wakerman J, Pashen D. Systematic review of effective retention  
16 463 incentives for health workers in rural and remote areas: Towards evidence-based policy. Aust J  
17 464 Rural Health. 2010;18(3):102-9.
- 18  
19 465 22. National Rural Health Alliance. Australia's health system needs re-balancing: A report on  
20 466 the shortage of primary care services in rural and remote areas. Canberra: NRHA; 2011.
- 21 467 23. Wakerman J, Sparrow L, Thomas SL, et al. Equitable resourcing of primary health care in  
22 468 remote communities in Australia's Northern Territory: a pilot study. BMC Fam Pract.  
23 469 2017;18(1):75.
- 24  
25 470 24. Baeza JI, Lewis JM. Indigenous health organizations in Australia: connections and  
26 471 capacity. Int J Health Serv. 2010;40(4):719-42.
- 27 472 25. Taylor J, Dollard J, Weetra C, Wilkinson D. Contemporary management issues for  
28 473 Aboriginal Community Controlled Health Services. Aust Health Rev. 2001;24(3):125-32.
- 29  
30 474 26. Freeman T, Baum F, Lawless A, et al. Case Study of an Aboriginal Community-Controlled  
31 475 Health Service in Australia: Universal, Rights-Based, Publicly Funded Comprehensive Primary  
32 476 Health Care in Action. Health Hum Rights. 2016;18(2):93-108.
- 33  
34 477 27. de Toca L. The world in East Arnhem. 14th National Rural Health Conference; Cairns,  
35 478 Australia: NRHA; 2017.
- 36 479 28. Gomersall JS, Gibson O, Dwyer J, et al. What Indigenous Australian clients value about  
37 480 primary health care: a systematic review of qualitative evidence. Aust N Z J Public Health.  
38 481 2017;41(4):417-23.

39 482

40 483

41 484

42 485

43 486

44 487

45 488

46 489

47 489

48 489

49 489

50 489

51 489

52 489

53 489

54 489

## Figure Titles

**Figure 1. Cost-effectiveness plane comparing higher ( $\geq 10\%$ ) with lower ( $< 10\%$ ) monthly turnover rates in remote clinics**

1  
2  
3 490  
4  
5 491 **Figure 2. Cost-effectiveness acceptability curve for comparing cost-effectiveness in**  
6  
7 492 **terms of saving hospitalisation costs between higher ( $\geq 10\%$ ) and lower ( $< 10\%$ ) monthly**  
8  
9 493 **nurse and Aboriginal Health Practitioner turnover rates in remote clinics**

10  
11 494  
12  
13  
14 495 **Figure 3. Cost-effectiveness plane comparing higher ( $\geq 10\%$ ) with lower ( $< 10\%$ )**  
15  
16 496 **proportional use of agency-employed nurses in remote clinics**

17  
18  
19 497  
20  
21 498 **Figure 4. Acceptability curve for comparing cost-effectiveness in terms of saving life-**  
22  
23 499 **years between higher ( $\geq 10\%$ ) and lower ( $< 10\%$ ) proportional use of agency nurses in**  
24  
25 500 **remote clinics**

26  
27  
28 501

29  
30  
31 502

32  
33 503  
34  
35  
36  
37  
38  
39  
40  
41  
42  
43  
44  
45  
46  
47  
48  
49  
50  
51  
52  
53  
54  
55  
56  
57



1  
2  
3  
4  
5  
6  
7  
8  
9  
10  
11  
12  
13  
14  
15  
16  
17  
18  
19  
20  
21  
22  
23  
24  
25  
26  
27  
28  
29  
30  
31  
32  
33  
34  
35  
36  
37  
38  
39  
40  
41  
42  
43  
44  
45  
46  
47  
48  
49  
50  
51  
52  
53  
54  
55  
56  
57  
58  
59  
60

504

For peer review only

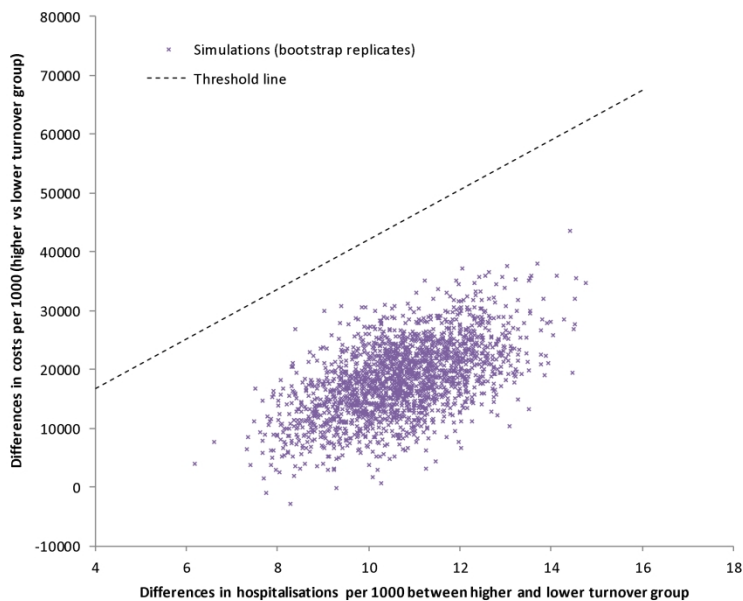

Figure 1. Cost-effectiveness plane comparing higher ( $\geq 10\%$ ) with lower ( $< 10\%$ ) monthly turnover rates in remote clinics

297x209mm (300 x 300 DPI)

1  
2  
3  
4  
5  
6  
7  
8  
9  
10  
11  
12  
13  
14  
15  
16  
17  
18  
19  
20  
21  
22  
23  
24  
25  
26  
27  
28  
29  
30  
31  
32  
33  
34  
35  
36  
37  
38  
39  
40  
41  
42  
43  
44  
45  
46  
47  
48  
49  
50  
51  
52  
53  
54  
55  
56  
57  
58  
59  
60

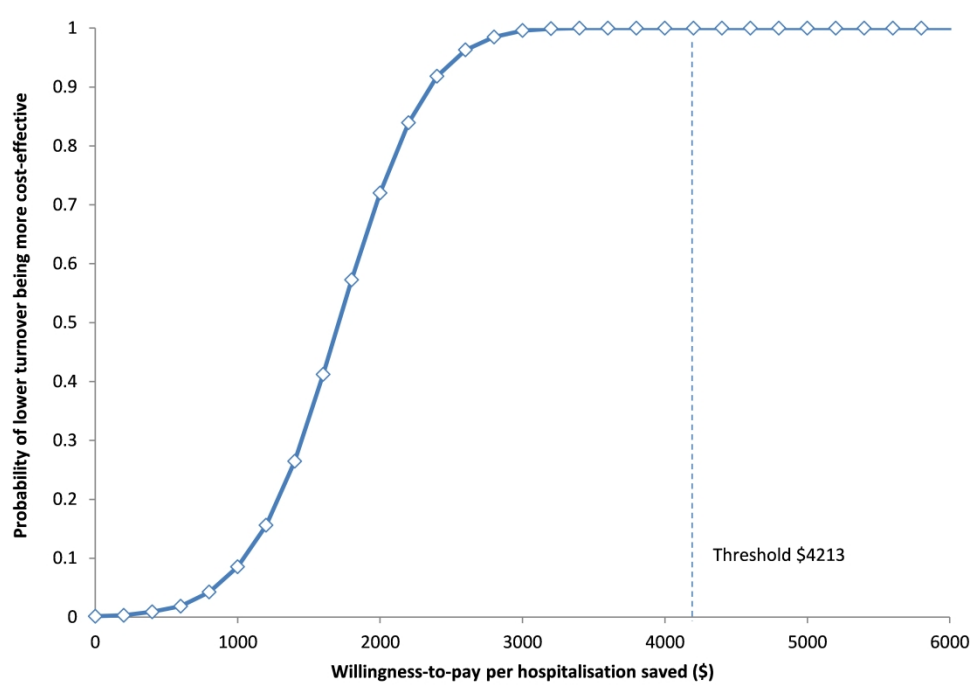

Figure 2. Cost-effectiveness acceptability curve for comparing cost-effectiveness in terms of saving hospitalisation costs between higher ( $\geq 10\%$ ) and lower ( $< 10\%$ ) monthly nurse and Aboriginal Health Practitioner turnover rates in remote clinics

1134x810mm (600 x 600 DPI)

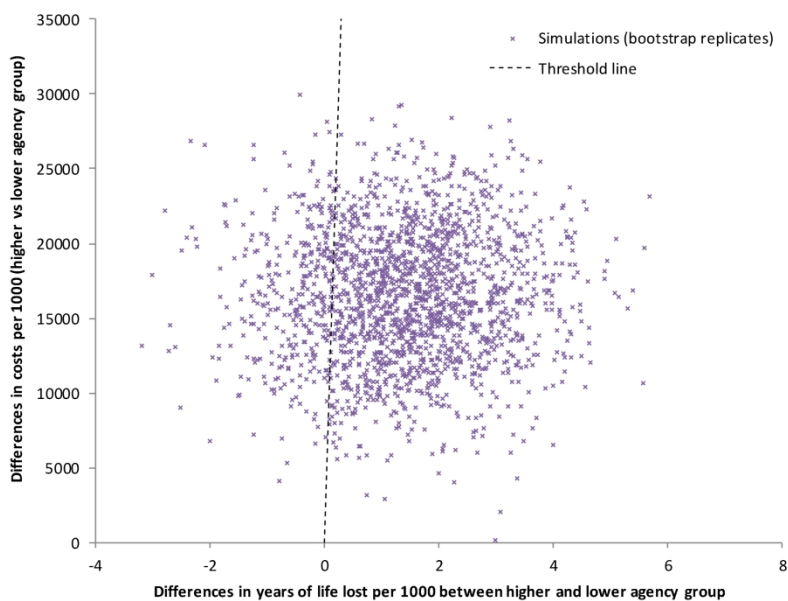

Figure 3. Cost-effectiveness plane comparing higher ( $\geq 10\%$ ) with lower ( $< 10\%$ ) proportional use of agency-employed nurses in remote clinics

297x209mm (300 x 300 DPI)

1  
2  
3  
4  
5  
6  
7  
8  
9  
10  
11  
12  
13  
14  
15  
16  
17  
18  
19  
20  
21  
22  
23  
24  
25  
26  
27  
28  
29  
30  
31  
32  
33  
34  
35  
36  
37  
38  
39  
40  
41  
42  
43  
44  
45  
46  
47  
48  
49  
50  
51  
52  
53  
54  
55  
56  
57  
58  
59  
60

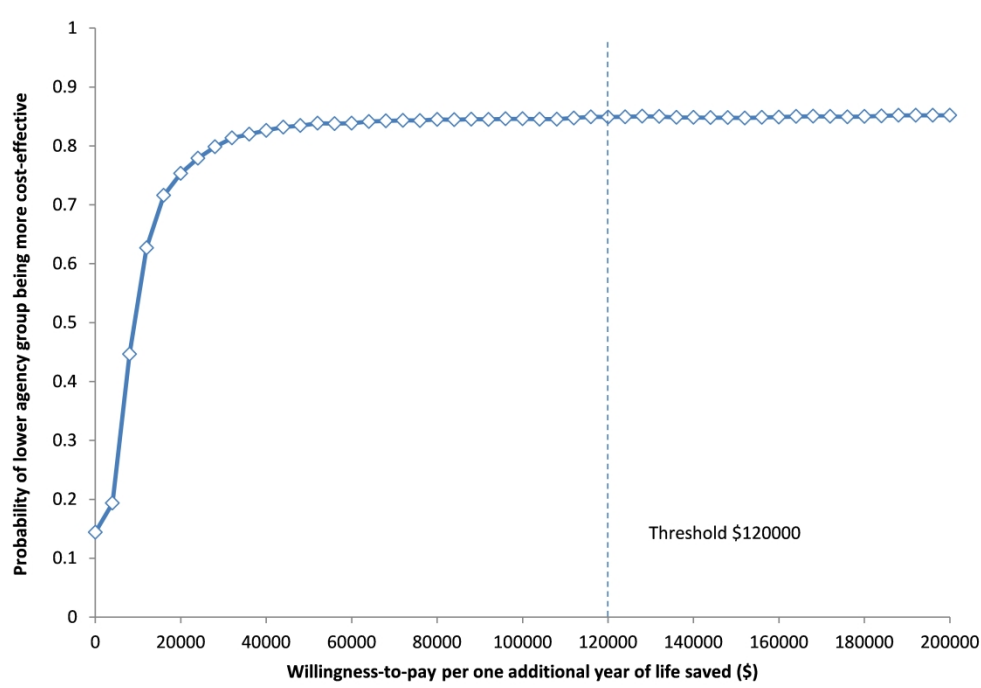

Figure 4. Acceptability curve for comparing cost-effectiveness in terms of saving life-years between higher ( $\geq 10\%$ ) and lower ( $< 10\%$ ) proportional use of agency nurses in remote clinics

1134x810mm (600 x 600 DPI)

## CHEERS checklist—Items to include when reporting economic evaluations of health interventions

| Section/item                                           | Item No | Recommendation                                                                                                                                                                                                                                                                                                               | Reported on page No/<br>line No                                                 |
|--------------------------------------------------------|---------|------------------------------------------------------------------------------------------------------------------------------------------------------------------------------------------------------------------------------------------------------------------------------------------------------------------------------|---------------------------------------------------------------------------------|
| <b>Title and abstract</b>                              |         |                                                                                                                                                                                                                                                                                                                              |                                                                                 |
| Title                                                  | 1       | Identify the study as an economic evaluation or use more specific terms such as “cost-effectiveness analysis”, and describe the interventions compared.                                                                                                                                                                      | page 1, line 1 to 2                                                             |
| Abstract                                               | 2       | Provide a structured summary of objectives, perspective, setting, methods (including study design and inputs), results (including base case and uncertainty analyses), and conclusions.                                                                                                                                      | page 1, line 4 to page 2, line 40                                               |
| <b>Introduction</b>                                    |         |                                                                                                                                                                                                                                                                                                                              |                                                                                 |
| Background and objectives                              | 3       | Provide an explicit statement of the broader context for the study.                                                                                                                                                                                                                                                          | page 3, line 61 to page 4, line 77                                              |
|                                                        |         | Present the study question and its relevance for health policy or practice decisions.                                                                                                                                                                                                                                        | page 4, line 78 to 85                                                           |
| <b>Methods</b>                                         |         |                                                                                                                                                                                                                                                                                                                              |                                                                                 |
| Target population and subgroups                        | 4       | Describe characteristics of the base case population and subgroups analysed, including why they were chosen.                                                                                                                                                                                                                 | page 4, line 87 to page 5, line 95;                                             |
| Setting and location                                   | 5       | State relevant aspects of the system(s) in which the decision(s) need(s) to be made.                                                                                                                                                                                                                                         | page 4, line 87 to page 5, line 95;                                             |
| Study perspective                                      | 6       | Describe the perspective of the study and relate this to the costs being evaluated.                                                                                                                                                                                                                                          | page 8, line 165 to 167                                                         |
| Comparators                                            | 7       | Describe the interventions or strategies being compared and state why they were chosen.                                                                                                                                                                                                                                      | Page 5, line 108 to 110; page 6, line 119 to 121; page 7, line 141 to line 144; |
| Time horizon                                           | 8       | State the time horizon(s) over which costs and consequences are being evaluated and say why appropriate.                                                                                                                                                                                                                     | page 5, line 102 to 103                                                         |
| Discount rate                                          | 9       | Report the choice of discount rate(s) used for costs and outcomes and say why appropriate.                                                                                                                                                                                                                                   | page 7, line 154 to 156                                                         |
| Choice of health outcomes                              | 10      | Describe what outcomes were used as the measure(s) of benefit in the evaluation and their relevance for the type of analysis performed.                                                                                                                                                                                      | page 7, lines 145 to 151                                                        |
| Measurement of effectiveness                           | 11a     | <i>Single study-based estimates</i> : Describe fully the design features of the single effectiveness study and why the single study was a sufficient source of clinical effectiveness data.                                                                                                                                  | page 5, line 99 to page 8, line 183; page 3 line 47 to 58                       |
|                                                        | 11b     | <i>Synthesis-based estimates</i> : Describe fully the methods used for identification of included studies and synthesis of clinical effectiveness data.                                                                                                                                                                      | Not applicable                                                                  |
| Measurement and valuation of preference based outcomes | 12      | If applicable, describe the population and methods used to elicit preferences for outcomes.                                                                                                                                                                                                                                  | Not applicable                                                                  |
| Estimating resources and costs                         | 13a     | <i>Single study-based economic evaluation</i> : Describe approaches used to estimate resource use associated with the alternative interventions. Describe primary or secondary research methods for valuing each resource item in terms of its unit cost. Describe any adjustments made to approximate to opportunity costs. | page 5, line 99 to page 8, line 183                                             |

| Section/item                                                         | Item No | Recommendation                                                                                                                                                                                                                                                                                                                                        | Reported on page No/<br>line No                                                                        |
|----------------------------------------------------------------------|---------|-------------------------------------------------------------------------------------------------------------------------------------------------------------------------------------------------------------------------------------------------------------------------------------------------------------------------------------------------------|--------------------------------------------------------------------------------------------------------|
|                                                                      | 13b     | <i>Model-based economic evaluation:</i> Describe approaches and data sources used to estimate resource use associated with model health states. Describe primary or secondary research methods for valuing each resource item in terms of its unit cost. Describe any adjustments made to approximate to opportunity costs.                           | Not applicable                                                                                         |
| Currency, price date, and conversion                                 | 14      | Report the dates of the estimated resource quantities and unit costs. Describe methods for adjusting estimated unit costs to the year of reported costs if necessary. Describe methods for converting costs into a common currency base and the exchange rate.                                                                                        | Page 5, line 102-103; page 5, line 111 to 113; page 7, line 154 to 156                                 |
| Choice of model                                                      | 15      | Describe and give reasons for the specific type of decision-analytical model used. Providing a figure to show model structure is strongly recommended.                                                                                                                                                                                                | page 14, line 293 to 294                                                                               |
| Assumptions                                                          | 16      | Describe all structural or other assumptions underpinning the decision-analytical model.                                                                                                                                                                                                                                                              | Not applicable                                                                                         |
| Analytical methods                                                   | 17      | Describe all analytical methods supporting the evaluation. This could include methods for dealing with skewed, missing, or censored data; extrapolation methods; methods for pooling data; approaches to validate or make adjustments (such as half cycle corrections) to a model; and methods for handling population heterogeneity and uncertainty. | page 6, line 141 to page 8, line 183                                                                   |
| <b>Results</b>                                                       |         |                                                                                                                                                                                                                                                                                                                                                       |                                                                                                        |
| Study parameters                                                     | 18      | Report the values, ranges, references, and, if used, probability distributions for all parameters. Report reasons or sources for distributions used to represent uncertainty where appropriate. Providing a table to show the input values is strongly recommended.                                                                                   | page 8, line 170 to 173; page 8, line 177 to 178; page 9, line 188 to 190                              |
| Incremental costs and outcomes                                       | 19      | For each intervention, report mean values for the main categories of estimated costs and outcomes of interest, as well as mean differences between the comparator groups. If applicable, report incremental cost-effectiveness ratios.                                                                                                                | page 9, line 192 to 194; page 10, Table 1; page 10, line 206 to 208; page 11, Table 2                  |
| Characterising uncertainty                                           | 20a     | <i>Single study-based economic evaluation:</i> Describe the effects of sampling uncertainty for the estimated incremental cost and incremental effectiveness parameters, together with the impact of methodological assumptions (such as discount rate, study perspective).                                                                           | Page 9, line 195 to 199; page 10, line 212 to 215; Figures 1 to 4; page 10, Table 1; page 11, Table 2. |
|                                                                      | 20b     | <i>Model-based economic evaluation:</i> Describe the effects on the results of uncertainty for all input parameters, and uncertainty related to the structure of the model and assumptions.                                                                                                                                                           | Not applicable                                                                                         |
| Characterising heterogeneity                                         | 21      | If applicable, report differences in costs, outcomes, or cost-effectiveness that can be explained by variations between subgroups of patients with different baseline characteristics or other observed variability in effects that are not reducible by more information.                                                                            | Not applicable                                                                                         |
| <b>Discussion</b>                                                    |         |                                                                                                                                                                                                                                                                                                                                                       |                                                                                                        |
| Study findings, limitations, generalisability, and current knowledge | 22      | Summarise key study findings and describe how they support the conclusions reached. Discuss limitations and the generalisability of the findings and how the findings fit with current knowledge.                                                                                                                                                     | page 12, line 238 to page 15, line 299                                                                 |

| Section/item          | Item No | Recommendation                                                                                                                                                                                                                                    | Reported on page No/<br>line No          |
|-----------------------|---------|---------------------------------------------------------------------------------------------------------------------------------------------------------------------------------------------------------------------------------------------------|------------------------------------------|
| <b>Other</b>          |         |                                                                                                                                                                                                                                                   |                                          |
| Source of funding     | 23      | Describe how the study was funded and the role of the funder in the identification, design, conduct, and reporting of the analysis. Describe other non-monetary sources of support.                                                               | page 16, line 332 to<br>page 16 line 335 |
| Conflicts of interest | 24      | Describe any potential for conflict of interest of study contributors in accordance with journal policy. In the absence of a journal policy, we recommend authors comply with International Committee of Medical Journal Editors recommendations. | page 16, line 336 to<br>337              |

For consistency, the CHEERS statement checklist format is based on the format of the CONSORT statement checklist



# BMJ Open

## Costs and effects of higher turnover of nurses and Aboriginal Health Practitioners and higher use of short-term nurses in remote Australian primary care services: An observational cohort study

|                                 |                                                                                                                                                                                                                                                                                                                                                                                                                                                                                                                                                        |
|---------------------------------|--------------------------------------------------------------------------------------------------------------------------------------------------------------------------------------------------------------------------------------------------------------------------------------------------------------------------------------------------------------------------------------------------------------------------------------------------------------------------------------------------------------------------------------------------------|
| Journal:                        | <i>BMJ Open</i>                                                                                                                                                                                                                                                                                                                                                                                                                                                                                                                                        |
| Manuscript ID                   | bmjopen-2018-023906.R1                                                                                                                                                                                                                                                                                                                                                                                                                                                                                                                                 |
| Article Type:                   | Research                                                                                                                                                                                                                                                                                                                                                                                                                                                                                                                                               |
| Date Submitted by the Author:   | 19-Oct-2018                                                                                                                                                                                                                                                                                                                                                                                                                                                                                                                                            |
| Complete List of Authors:       | Zhao, Yuejen; Health Gains Planning, Department of Health Russell, Deborah; Flinders University, College of Medicine and Public Health<br>Guthridge, Steven; Menzies School of Health Research, Child Development, Population Health and Policy<br>Ramjan, Mark; Northern Territory Department of Health<br>Jones, Michael; Macquarie University, Psychology Department<br>Humphreys, John; Monash University, School of Rural Health<br>Wakerman, John; A Joint Centre of Flinders University and Charles Darwin University, Centre for Remote Health |
| <b>Primary Subject Heading</b>: | Health services research                                                                                                                                                                                                                                                                                                                                                                                                                                                                                                                               |
| Secondary Subject Heading:      | Health economics, Health policy, Nursing, Public health                                                                                                                                                                                                                                                                                                                                                                                                                                                                                                |
| Keywords:                       | HEALTH ECONOMICS, Health economics < HEALTH SERVICES ADMINISTRATION & MANAGEMENT, Health policy < HEALTH SERVICES ADMINISTRATION & MANAGEMENT, Human resource management < HEALTH SERVICES ADMINISTRATION & MANAGEMENT                                                                                                                                                                                                                                                                                                                                 |
|                                 |                                                                                                                                                                                                                                                                                                                                                                                                                                                                                                                                                        |

SCHOLARONE™  
Manuscripts

1  
2  
3  
4 1 **Costs and effects of higher turnover of nurses and Aboriginal Health**  
5 2 **Practitioners and higher use of short-term nurses in remote**  
6 3 **Australian primary care services: An observational cohort study**  
7  
8  
9 4

10 5 **AUTHORS and AFFILIATIONS:**

11 6 **Yuejen Zhao**

12 7 Department of Health, PO Box 40596, Darwin, NT 0800, Australia

13 8 yuejen.zhao@nt.gov.au  
14 9

15 10 **Deborah J Russell, <sup>1</sup>**

16 11 Flinders Northern Territory, PO Box 666, Bendigo, Victoria 3552, Australia

17 12 deborah.russell@monash.edu  
18 13

19 14 **Steven Guthridge,**

20 15 Child Development, Population Health and Policy, Menzies School of Health Research, PO Box  
21 16 41096, Casuarina, NT 0811, Australia

22 17 steve.guthridge@menzies.edu.au  
23 18

24 19 **Mark Ramjan,**

25 20 Department of Health, PO Box 40596, Darwin, NT 0800, Australia

26 21 mark.ramjan@nt.gov.au  
27 22

28 23 **Michael P Jones,**

29 24 Faculty of Human Sciences, Macquarie University, North Ryde, NSW 2109, Australia

30 25 mike.jones@mq.edu.au  
31 26  
32  
33  
34  
35  
36  
37  
38  
39  
40  
41  
42  
43  
44  
45  
46  
47  
48  
49  
50  
51  
52  
53  
54  
55  
56  
57  
58  
59  
60

1  
2  
3 27  
4  
5 28 **John S Humphreys,**  
6  
7 29 Monash Rural Health, Monash University, PO Box 91, Strathdale, Victoria 3550, Australia  
8  
9 30 john.humphreys@monash.edu  
10

11 31  
12  
13 32 **John Wakerman,**  
14  
15 33 Centre for Remote Health, PO Box 4066, Alice Springs, NT 0871  
16  
17 34 john.wakerman@flinders.edu.au  
18

19 35  
20 36  
21 37 <sup>1</sup> Corresponding author  
22  
23 38  
24 39

25  
26 40 **Word count**

27  
28 41 3262  
29  
30 42  
31 43  
32 44  
33 45  
34 46  
35 47  
36 48  
37 49  
38 50  
39 51  
40 52  
41 53  
42 54  
43 55  
44 56  
45 57  
46 58  
47  
48  
49  
50  
51  
52  
53  
54  
55  
56  
57  
58  
59  
60

1  
2  
3 **59 Abstract**  
4  
5

6 60  
7  
8 **61 Objectives:**  
9

10 62 To compare the costs and effects of higher turnover of resident nurses and Aboriginal Health  
11  
12 63 Practitioners and higher use of agency-employed nurses in remote primary care services and  
13  
14 64 quantify associations between staffing patterns and health outcomes in remote primary care  
15  
16 65 clinics in the Northern Territory (NT) of Australia.  
17  
18

19 66 **Design:**  
20

21  
22 67 Observational cohort study, using hospital admission, financial, and payroll data for the period  
23  
24 68 2013-2015.  
25

26 69 **Setting:**  
27

28  
29 70 53 NT Government run primary care clinics in remote communities.  
30  
31

32 71 **Outcome measures:**  
33

34 72 Incremental cost-effectiveness ratios were calculated for higher compared with lower turnover  
35  
36 73 and higher compared with lower use of agency-employed nurses. Costs comprised primary  
37  
38 74 care, travel, and hospitalisation costs. Effect measures were total hospitalisations and years of  
39  
40 75 life lost per 1000 person-months. Multiple regression was performed to investigate associations  
41  
42 76 between overall health costs and turnover rates and use of agency-employed nurses, after  
43  
44 77 adjusting for key confounders.  
45  
46

47 78 **Results:**  
48

49  
50 79 Higher turnover was associated with significantly higher hospitalisation rates ( $p<0.001$ ) and  
51  
52 80 higher average health costs ( $p=0.002$ ) than lower turnover. Lower turnover was always more  
53  
54 81 cost-effective. Average costs were significantly ( $p<0.001$ ) higher when higher proportions of  
55  
56  
57  
58  
59  
60

1  
2  
3 82 agency-employed nurses were employed. The probability that lower use of agency-employed  
4  
5 83 nurses was more cost-effective was 0.84. Halving turnover and reducing use of a short-term  
6  
7 84 workforce has the potential to save \$32 million annually in the NT.  
8  
9

## 10 85 **Conclusion**

11  
12 86 High turnover of health staff is costly and associated with poorer health outcomes for Aboriginal  
13  
14 87 peoples living in remote communities. High reliance on agency nurses is also very likely to be  
15  
16 88 cost-*ineffective*. Investment in a coordinated range of workforce strategies that support  
17  
18 89 recruitment and retention of resident nurses and Aboriginal Health Practitioners in remote clinics  
19  
20 90 is needed to stabilise the workforce, minimise the risks for high staff turnover and overreliance  
21  
22 91 on agency nurses, and thereby significantly reduce expenditure and improve health outcomes.  
23  
24  
25

## 26 92 27 28 93 **Keywords**

29  
30  
31 94 Remote health, Health workforce, Turnover, Remote area nurse, Aboriginal Health Practitioner,  
32  
33 95 Fly-in fly-out, Remote health services, Health manpower, Indigenous health  
34  
35

36 96  
37 97  
38  
39  
40  
41  
42  
43  
44  
45  
46  
47  
48  
49  
50  
51  
52  
53  
54  
55  
56  
57  
58  
59  
60

## 98 **Article Summary**

### 99 **Strengths and limitations of this study**

- 100 • Data are for an entire population - remote living residents in communities serviced by  
101 Northern Territory Department of Health;
- 102 • Primary care and secondary care data are linked;
- 103 • Univariate analyses (calculation of Incremental Cost-effectiveness Ratios) are  
104 complemented by multiple regression analyses which adjust for key potential  
105 confounders;
- 106 • Analyses included assessing differences in costs and effects that were related to  
107 hospital admissions for dialysis and demographic composition of communities  
108 (predominantly non-Aboriginal or not);
- 109 • Effectiveness of primary care used proxy measures (hospitalisation rates; years of life  
110 lost rates) which may not necessarily best reflect effectiveness of primary care.

## 113 **Introduction**

114 There is an urgent need for high quality primary care (PC) services for disadvantaged Aboriginal  
115 and Torres Strait Islander populations (referred to as Aboriginal hereafter) in remote  
116 communities of Australia. Australian Aboriginal peoples have higher levels of risk factors for  
117 many communicable and non-communicable diseases and experience higher rates of complex  
118 acute and chronic diseases such as infectious diseases, ischaemic heart disease, diabetes and  
119 chronic kidney disease compared to non-Aboriginal Australians.(1-4) The gaps in life  
120 expectancy at birth between Aboriginal and non-Aboriginal population in the Northern Territory  
121 (NT) of Australia in 2009-13 were 15 and 16 years in males and females respectively.(5) In  
122 2016, 30% of the NT population was Aboriginal and 70% of Aboriginal population lived in rural

1  
2  
3 123 and remote areas.(6) Australian governments have committed to closing the gap in health  
4  
5 124 outcomes between Aboriginal and non-Aboriginal Australians.(7)  
6

7  
8 125 In many remote NT communities, PC is mainly delivered by staff employed directly by the NT  
9  
10 126 Government. In these remote communities 'resident' staff comprise, on average, 2 nurses or  
11  
12 127 midwives (henceforth called nurses), 0.6 Aboriginal Health Practitioners (AHPs) and 2.2 other  
13  
14 128 employees all of whom live in the communities on a medium to long-term basis. Agency-  
15  
16 129 employed nurses provide, on average, 0.4 FTE of additional health manpower per clinic on a  
17  
18 130 short-term, fly-in fly-out basis.(8) District medical officers and allied health professionals provide  
19  
20 131 additional professional services to patients living in these remote communities through  
21  
22 132 intermittent scheduled visits and telehealth consultations.  
23

24  
25 133 Recent research shows that higher utilisation of PC services by Aboriginal people with chronic  
26  
27 134 diseases is cost-effective. Access to, and utilisation of, effective PC, however, may be  
28  
29 135 compromised in remote NT communities by extremely high turnover rates of resident clinical  
30  
31 136 staff and heavy reliance on short-term agency nurses.(8-10) Factors previously reported to be  
32  
33 137 associated with nurse turnover in NT include professional, social and geographical isolation, the  
34  
35 138 stressful work environment, unreasonably heavy workloads, lack of support from management  
36  
37 139 and inadequacy of housing.(11) NT Government initiatives in the past decade to decrease nurse  
38  
39 140 turnover have included changes to management practices to improve levels of support for  
40  
41 141 nurses, providing increased training and professional development opportunities, increasing the  
42  
43 142 flexibility of employment contracts and restructuring nursing classifications and increasing  
44  
45 143 remuneration.(12, 13)  
46  
47

48  
49 144 Primary care costs per person rise as geographical remoteness of communities increases and  
50  
51 145 population size decreases.(14-16) A large proportion of these costs relates to higher staffing  
52  
53 146 costs, and costs associated with staff and patients traveling long distances.(14, 17) Workforce  
54  
55 147 shortages and extremely high staff turnover (averaging 148% per annum for nurses) result in  
56  
57

1  
2  
3 148 42% of NT remote area nurses being employed on relatively expensive casual or agency  
4  
5 149 contracts.(8, 14, 16, 18)  
6  
7  
8 150 There is a lack of published quantitative evidence, however, of the costs, effectiveness, and  
9  
10 151 cost-effectiveness of different staffing patterns.(19) The aims of this research, therefore, are  
11  
12 152 threefold: first, to compare the costs and effects of higher turnover of resident remote area  
13  
14 153 nurses and AHPs with lower turnover; second, to compare the costs and effects of  
15  
16 154 proportionally higher use of agency-employed nurses with lower use of agency-employed  
17  
18 155 nurses; and, third, to quantify the effects of nurse and AHP turnover and use of agency-  
19  
20 156 employed nurses on health care costs, after adjusting for known confounders.  
21  
22  
23

## 24 157 **Methods**

### 26 158 **Study setting**

27  
28  
29 159 The study sites were 53 NT Department of Health (DOH) remote health clinics in 46  
30  
31 160 predominantly Aboriginal communities and 7 predominantly non-Aboriginal towns where  
32  
33 161 resident nurses and AHPs provide most clinical PC services. Temporary and ongoing nursing  
34  
35 162 and AHP vacancies were filled by DOH employed casual nurses, DOH employed agency  
36  
37 163 nurses or, as the least preferred, most expensive alternative, by agency-employed nurses  
38  
39 164 (nurses paid directly by nurse employment agencies). In this study the proportion of agency-  
40  
41 165 employed nurses was used as a marker of overall use of short-term nurses.  
42  
43  
44

### 45 166 **Patient involvement**

46  
47 167 This study comprised analysis of NT DOH secondary data (including individual-level de-  
48  
49 168 identified hospitalisation and primary care data). Patients were not directly involved in data  
50  
51 169 provision.  
52  
53

### 54 170 **Data**



1  
2  
3 171 Four NT DOH datasets were used: the Primary Care Information Systems (PCIS), Hospital  
4  
5 172 Inpatients Activity (HIA), Government Accounting System (GAS) and Personnel Information and  
6  
7 173 Payroll Systems (PIPS). The study period was 2013-2015, as this was the most recent period  
8  
9 174 for which the required costs, hospitalisations, ages at death, use of agency-employed nurses  
10  
11 175 and workforce turnover data were available.(8)

12  
13  
14 176 PIPS data were used to calculate turnover rates of Department-employed nurses and AHPs in  
15  
16 177 each month in each clinic (clinic-month):

17  
18  
19 178 
$$\text{Turnover rate} = \frac{\text{number of exits}}{\text{average number employed}} \times 100$$

20  
21  
22 179 An exit was defined when a staff member ceased working at a specific remote clinic for a period  
23  
24 180 of at least 12 weeks. A cut-off of 10% differentiated higher ( $\geq 10\%$ ) from lower ( $< 10\%$ ) turnover,  
25  
26 181 equating to 120% annual turnover. Previous research showed that the average annual turnover  
27  
28 182 rate of nurses and AHPs in these remote NT clinics is 128%.(20)

29  
30  
31 183 GAS data were used to calculate PC costs in Australian dollars for each clinic-month. PC clinic  
32  
33 184 costs comprised operational and personnel expenditures and excluded capital expenses.  
34  
35 185 Agency-employed nurse labour expenses were used to derive estimates of aggregated full-time  
36  
37 186 equivalent (FTE) agency-employed nurse use in each clinic-month using a standard NT DOH  
38  
39 187 formula:

40  
41  
42 188 
$$\text{Agency-employed nurse FTE} = \frac{\text{Agency-employed nurse labour expenses}}{2 \times \text{average DOH} - \text{employed nurse cost}} \quad (21)$$

43  
44  
45 189 Percentage use of agency-employed nurses in each clinic-month was calculated:

46  
47  
48 190 
$$\text{Percentage of agency-employed nurses} = \frac{\text{Agency-employed nurse FTE}}{\text{Total FTE nurse positions}} \times 100$$

49  
50  
51 191 A cut-off of 13% differentiated higher ( $\geq 13\%$ ) from lower ( $< 13\%$ ) use of agency-employed  
52  
53 192 nurses as previous research shows that FTE agency-employed nurses fill, on average, 13% of  
54  
55 193 nurse positions.(8)

1  
2  
3 194 PCIS data were used to determine the number of PC consultations in each clinic-month.

4  
5 195 Population catchments (service populations) for each remote clinic were defined as the number

6  
7 196 of unique patients recorded in PCIS in the previous 12 months.

8  
9  
10 197 HIA data were used to determine the community in which each patient lived at the time of

11  
12 198 hospital admission, to calculate the number of hospitalisations in each clinic-month, and to

13  
14 199 estimate hospitalisation costs using information on diagnoses (Australian Refined Diagnosis-

15  
16 200 Related Group (DRG) codes) provided in discharge summaries: (22)

17  
18 201 Hospitalisation costs =  $DRG\ cost\ weight \times NT\ benchmark\ prices$  .

19  
20  
21 202 Both HIA and PCIS data were used to determine age at death, from which Years of Life Lost

22  
23 203 (YLLs) were calculated using an age specific life expectancy table used in the Australian Burden

24  
25 204 of Disease study.(2)

26  
27  
28 205 Both GAS and PCIS data were used to estimate PC costs in each clinic-month, calculated by

29  
30 206 first deriving an average consultation cost which was the overall estimated expenditure of the

31  
32 207 clinic each year divided by the total occasions of service in that year. PC costs per person per

33  
34 208 month (person-month) were calculated as the average consultation cost multiplied by the

35  
36 209 number of consultations per person-month. Travel costs were calculated by doubling the

37  
38 210 straight line distance between the resident community and nearest hospital, based on a flat rate

39  
40 211 of \$2 per kilometre.(23)

## 41 42 43 212 **Analyses**

44  
45 213 Two separate incremental cost-effectiveness ratios were calculated using clinic-month data. In

46  
47 214 the first analysis (denoted in equations by subscript 1) comparison of costs and effects of higher

48  
49 215 turnover clinic-months were compared with lower turnover rates, whereas in the second

50  
51 216 analysis (subscript 2) costs and effects of clinic-months with higher use of agency-employed

52  
53 217 nurses were compared with lower use of agency-employed nurses.

218 Effects for the respective analyses were calculated as follows:

$$219 \quad \text{Effect rate}_1 = \frac{\text{Total number of hospitalisations}}{\text{Total number of person - months}} \times 1000 ;$$

$$220 \quad \text{Effect rate}_2 = \frac{\text{Total number of YLLs}}{\text{Total number of person - months}} \times 1000 .$$

221 Total hospitalisation and YLLs rates were used as these measures of benefit in the evaluation  
 222 were accessible and, having previously been reported in the peer-reviewed cost-effectiveness  
 223 extant literature in the remote Australian context, were known to be acceptable proxy measures  
 224 for the effectiveness of primary care.

225 Costs for the respective analyses were calculated as follows:

$$226 \quad \text{Costs rate} = \frac{\text{PC} + \text{Travel} + \text{Hospitalisation costs}}{\text{Total number of person - months}} \times 1000.$$

227 Costs and effects were measured for each person-month using current expenditure and health  
 228 care data within the short study timeframe. No future costs or future health outcomes were  
 229 considered, nor was discounting considered necessary in this study. The incremental cost-  
 230 effectiveness ratio (ICER) for the first analysis was calculated as the difference in average  
 231 health costs per 1000 person-months divided by the difference in effects (hospitalisation rates)  
 232 per 1000 person-months:

$$233 \quad \text{ICER}_1 = \frac{\text{Costs rate in high turnover clinic - months} - \text{Costs rates in lower turnover clinic - months}}{\text{Hospitalisation rate in high turnover clinic - months} - \text{Hospitalisation rate in lower turnover clinic - months}}$$

234 The ICER for the second analysis was calculated as the difference in average health costs per  
 235 1000 person-months, divided by the difference in effects (YLLs) per 1000 person-months:

$$236 \quad \text{ICER}_2 = \frac{\text{Costs in higher use of agency employed nurses clinic - months} - \text{Costs in lower use of agency employed nurses clinic - months}}{\text{YLLs rate in higher use of agency employed nurses clinic - months} - \text{YLLs rate in lower use of agency employed nurses clinic - months}}$$

237 Overall hospitalisation rates and YLLs rates were proxies for PC effectiveness in the first and  
 238 second analyses, respectively. In both analyses the perspective of the NT Government was  
 239 used to identify relevant costs incurred, which included PC, travel, and hospitalisation costs per

1  
2  
3 240 1000 person-months. A 'top down' approach was used to allocate total remote health  
4  
5 241 expenditure to each clinic, as described elsewhere. All costs were based on actual expenditure.  
6  
7  
8 242 In addition to calculating ICER point estimates, 2000 Bootstrap replicates were used to plot  
9  
10 243 cost-effectiveness planes (mean differences in the cost and effect pairs) and to construct cost-  
11  
12 244 effectiveness acceptability curves (probability that lower turnover or lower proportional use of  
13  
14 245 agency-employed nurses is cost-effective) to investigate uncertainty. Calculations of ICER also  
15  
16 246 examined variations in costs and effects if:

17  
18  
19 247 (1) clinics servicing predominantly non-Aboriginal communities were excluded;

20  
21 248 (2) hospitalisations for renal dialysis were excluded; and

22  
23  
24 249 (3) only potentially preventable hospitalisations (PPH) were included.(24)

25  
26  
27 250 The average NT cost per hospitalisation of \$4,213 was used as the benchmark price for a  
28  
29 251 hospitalisation.(22) A threshold of \$120,000 was used as the benchmark price for a YLL.(25)

30  
31 252 Multiple regression was used to investigate associations between overall costs and nurse and  
32  
33 253 AHP turnover rates and proportional use of agency-employed nurses, after adjusting for key  
34  
35 254 confounders. Potential confounders included Euclidean distance to the nearest hospital, PC  
36  
37 255 consultation rates, and hospitalisation rates (both total and PPH).

38  
39  
40 256 StataSE v14 was used for all analyses. A 0.05 level of statistical significance was used.

## 41 42 43 257 **Ethics**

44  
45 258 Ethics approval was received from the Human Research Ethics Committee of the NT DOH and  
46  
47 259 Menzies School of Health Research (2015-2363).

## 260 Results

261 Between 2013 and 2015 there were 1,266,708 person-months, 46,276 hospital admissions,  
 262 2,058,829 PC consultations, and a service population of approximately 35,000 persons. Total  
 263 health costs were \$603 million and there were 530 deaths with an estimated 17,750 YLLs.

### 264 1. Higher versus lower turnover

265 Remote clinic-months with lower staff turnover have both significantly lower total hospitalisation  
 266 rates ( $p < 0.001$ ) and lower average health cost rates ( $p = 0.002$ ) than higher staff turnover clinic-  
 267 months. (Table 1) Analyses for Aboriginal communities only and excluding hospitalisations for  
 268 renal dialysis revealed similar results, however analyses of PPHs found lower staff turnover  
 269 clinic-months were associated with increased costs ( $p < 0.001$ ) and no significant difference in  
 270 PPHs rate ( $p = 0.430$ ) compared with higher turnover clinic-months.

271 For the analysis of total hospitalisations, the cost-effectiveness plane shows lower turnover was  
 272 always associated with reduced hospitalisation rates and, in almost all instances, with savings in  
 273 average health care costs compared to higher turnover. (Figure 1) PC was cost-effective with  
 274 ICER being \$1,708 per hospitalisation (savings in both numerator and denominator). At the  
 275 current NT threshold of \$4,213 per hospitalisation, the probability of lower turnover being more  
 276 cost-effective is 1. (Figure 2)

277 **Table 1. Average health costs, hospitalisations, and incremental cost-effectiveness ratio**  
 278 **for higher and lower staff turnover, 2013-15**

|                                            | Monthly turnover       | Total hospitalisations | Excluding predominantly non-Aboriginal communities | Excluding hospitalisations for renal dialysis | Potentially preventable hospitalisations |
|--------------------------------------------|------------------------|------------------------|----------------------------------------------------|-----------------------------------------------|------------------------------------------|
| n (person-months)                          | Higher ( $\geq 10\%$ ) | 229,968                | 193,328                                            | 229,968                                       | 229,968                                  |
|                                            | Lower ( $< 10\%$ )     | 1,036,740              | 878,406                                            | 1,036,740                                     | 1,036,740                                |
| Hospitalisations (per 1000 person-months)  | Higher ( $\geq 10\%$ ) | 45.3                   | 51.7                                               | 17.8                                          | 2.5                                      |
|                                            | Lower ( $< 10\%$ )     | 34.6                   | 38.4                                               | 16.0                                          | 2.4                                      |
|                                            | <i>p</i> -value        | $< 0.001$              | $< 0.001$                                          | $< 0.001$                                     | 0.430                                    |
| Average health cost (\$) (per 1000 person- | Higher ( $\geq 10\%$ ) | \$491,043              | \$531,865                                          | \$446,344                                     | \$289,741                                |
| months)                                    | Lower ( $< 10\%$ )     | \$472,826              | \$511,977                                          | \$440,355                                     | \$300,740                                |

|                                      |                 |         |         |         |            |
|--------------------------------------|-----------------|---------|---------|---------|------------|
| months)                              | <i>p</i> -value | 0.002   | 0.003   | 0.271   | <0.001     |
| Incremental cost-effectiveness ratio |                 | \$1,708 | \$1,500 | \$3,365 | -\$107,830 |

279

## 280 2. Higher versus lower proportional use of agency-employed staff

281 Remote clinic-months with higher proportional use of agency-employed nurses have both a  
 282 significantly higher average health cost rate ( $p<0.001$ ) and higher YLLs rate ( $p<0.001$ ) than  
 283 clinic-months with lower use. (Table 2) Analyses examining variations in effects which excluded  
 284 predominantly non-Aboriginal communities and excluded renal dialysis hospitalisations  
 285 confirmed poorer outcomes (greater YLLs rates) in clinic-months with higher proportional use of  
 286 agency-employed nurses. In remote Aboriginal communities (excluding predominantly non-  
 287 Aboriginal communities), however, overall costs were higher in clinic-months that had  
 288 proportionally lower use of agency-employed nurses ( $p<0.001$ ). PPHs analysis showed no  
 289 significant differences in YLLs between clinic-months with higher and lower proportional use of  
 290 agency-employed nurses.

291 For the analysis of the total study population, lower proportional use of agency nurses was  
 292 always associated with health cost savings though less strongly associated with fewer YLLs.  
 293 (Figure 3) At the threshold value of \$120,000 per YLL, the probability of lower use of agency-  
 294 employed nurses being more cost-effective was 0.838. (Figure 4)

295 **Table 2. Average health costs, years of life lost, and incremental cost-effectiveness ratio**  
 296 **for higher and lower proportional use of agency-employed nurses, 2013-15**

|                                                   | Agency nurse proportion | Total     | Excluding predominantly non-Aboriginal communities | Excluding hospitalisations for renal dialysis | Potentially preventable hospitalisations |
|---------------------------------------------------|-------------------------|-----------|----------------------------------------------------|-----------------------------------------------|------------------------------------------|
| n (person-months)                                 | Higher ( $\geq 13\%$ )  | 704,240   | 636,525                                            | 704,240                                       | 704,240                                  |
|                                                   | Lower ( $<13\%$ )       | 562,468   | 435,209                                            | 562,468                                       | 562,468                                  |
| YLL (per 1000 person-months)                      | Higher ( $\geq 13\%$ )  | 14.6      | 13.7                                               | 14.6                                          | 0.0                                      |
|                                                   | Lower ( $<13\%$ )       | 13.3      | 12.8                                               | 13.3                                          | 0.1                                      |
|                                                   | <i>p</i> -value         | <0.001    | <0.001                                             | <0.001                                        | 0.978                                    |
| Average health cost (\$) (per 1000 person-months) | Higher ( $\geq 13\%$ )  | \$480,915 | \$503,989                                          | \$446,289                                     | \$301,567                                |
|                                                   | Lower ( $<13\%$ )       | \$470,145 | \$532,494                                          | \$435,375                                     | \$295,207                                |

|      |                 |         |           |         |           |
|------|-----------------|---------|-----------|---------|-----------|
|      | <i>p</i> -value | <0.001  | <0.001    | <0.001  | <0.001    |
| ICER |                 | \$7,964 | -\$29,310 | \$8,070 | -\$70,757 |

297

### 298 3. Multiple regression modelling of overall cost rates

299 Overall health cost rates were significantly associated with hospitalisations, PPHs, PC

300 consultations, turnover, use of agency-employed nurses, and distance to nearest hospital.

301 (Table 3) Each 10% increase in annual turnover was associated with an increased cost of \$11

302 per person-month. For each 10% increase in proportion of agency-employed nurses used, there

303 was an associated increase in cost of \$10 per person-month. One PPH was associated with an

304 increased cost of \$10,063, which was in addition to the costs of a normal hospitalisation.

305 Sensitivity analyses (not shown) revealed similar coefficient estimates.

306 Assuming a service population of 35,000 residents, reducing turnover from 120% per annum to

307 60% and no longer using agency-employed nurses (reducing from 13% to 0%) results in

308 potential savings of \$32 million annually in PC, hospitalisations, and travel costs.

309

310 **Table 3. Multiple linear regression model predicting total health costs per person-month**

|                                                   | Coefficient | 95% CI Lower limit | 95% CI Upper limit |
|---------------------------------------------------|-------------|--------------------|--------------------|
| Number of hospitalisations                        | 2591**      | 2584               | 2598               |
| 10% increase in nurse and AHP annual turnover     | 11**        | 7                  | 15                 |
| 10% increase in proportional use of agency nurses | 10**        | 8                  | 11                 |
| Potentially preventable hospitalisations          | 10063**     | 10001              | 10126              |
| Euclidian distance to hospital (km)               | 0.16**      | 0.14               | 0.17               |
| Number of Primary Care consultations              | 170**       | 169                | 171                |

311 \*\* *p*<0.001; AHP Aboriginal Health Practitioners; CI Confidence interval.

1  
2  
3 3124  
5 313 **Discussion**

6  
7  
8 314 This landmark empirical study shows that lower nurse and AHP turnover is associated with  
9  
10 315 significantly lower total hospitalisations ( $p<0.001$ ), lower average health cost rates ( $p=0.002$ )  
11  
12 316 and is more cost-effective than higher turnover. The potential savings in health care costs of  
13  
14 317 reducing staff turnover are in the order of \$32 million annually. Also, lower use of short-term  
15  
16 318 agency nurses has an 84% likelihood of being more cost-effective than higher use.

17  
18  
19 319 For Aboriginal communities, PC cost rates were significantly higher in clinic-months that had  
20  
21 320 lower use of agency-employed nurses. This finding was, at face value, counter-intuitive, as  
22  
23 321 agency-employed labour hire is the most expensive staffing option. One possible explanation is  
24  
25 322 confounding of the association by geographical remoteness: the multiple linear regression  
26  
27 323 analysis confirmed that more geographically remote clinics have higher operating costs,  
28  
29 324 consistent with previous research.<sup>(14)</sup> More geographically remote clinics may also be more  
30  
31 325 likely to have lower use of agency nurses and incur even higher costs, for example because  
32  
33 326 agency-employed nurses may be less willing to work in the most geographically remote health  
34  
35 327 services. This research used regression analysis to confirm that health care costs in remote PC  
36  
37 328 clinics are positively and significantly associated with hospitalisations (total and PPH), nurse  
38  
39 329 and AHP turnover rates, use of agency-employed nurses, geographical remoteness and the  
40  
41 330 number of primary care consultations (Table 3).

42  
43  
44  
45 331 These are important findings for policymakers and health service managers. The findings  
46  
47 332 suggest that effective investments in workforce strategies that reduce turnover rates and  
48  
49 333 decrease undue reliance on short-term agency nurses may have very significant net benefits,  
50  
51 334 both to the health services' budgets as well as to longer term health outcomes for  
52  
53 335 disadvantaged Aboriginal populations.



1  
2  
3 336 This research highlights a pressing need to invest in the systematic implementation of a co-  
4  
5 337 ordinated range of short and longer term remote workforce strategies in order to stabilise the  
6  
7 338 workforce, improve continuity of care, and thereby improve health outcomes. Whilst our  
8  
9 339 knowledge about the effectiveness of various PC workforce retention interventions is incomplete  
10  
11 340 (26), available evidence suggests that effective short-term retention strategies should be  
12  
13 341 multifaceted and include the following components: necessary infrastructure, including adequate  
14  
15 342 housing, vehicle, and communication technologies; offer realistic remuneration, including salary  
16  
17 343 packaging and retention bonuses; ensure organisational effectiveness by (i) strengthening  
18  
19 344 health service and clinic management and leadership, (ii) ensuring comprehensive staff  
20  
21 345 orientation and induction, and (iii) maintaining a professional environment through mentoring,  
22  
23 346 ongoing professional development, and promoting scholarship; provide appropriate personal  
24  
25 347 and family support for employees; and implement alternative workforce models that are more  
26  
27 348 likely to ensure continuity of care, such as employing nurses to work one month on, one month  
28  
29 349 off in shared positions.

30  
31  
32  
33 350 Longer-term retention strategies, similarly, may best be bundled together, and may include:  
34  
35 351 providing sufficient funding to ensure an adequate supply of remote health professionals  
36  
37 352 relative to population needs without undue reliance on short-term staff; increased recruitment of,  
38  
39 353 and support for, Aboriginal people to take up clinical and non-clinical roles, which may include  
40  
41 354 the adoption of training models which enable AHP training to be largely based in remote  
42  
43 355 communities; building appropriate training pathways for remote area nurses in partnership with  
44  
45 356 local educational institutions, with a particular focus on appropriate student selection, a  
46  
47 357 contextualised program, and a supported post-graduate employment pathway; and transitioning  
48  
49 358 governance arrangements from NT Government-run to Aboriginal community control. While it is  
50  
51 359 not known whether community-control of health services is associated with lower health  
52  
53 360 workforce turnover and lower use of short-term agency nurses, we do know that Aboriginal  
54  
55  
56  
57  
58  
59  
60

1  
2  
3 361 Community Controlled Health Services employ a high proportion of Aboriginal staff, and that  
4  
5 362 family connections and a sense of ownership of the service (27) contribute to improved access.  
6  
7 363 (28, 29)  
8  
9

10 364 This study is not without some limitations. Firstly, estimates of the effects of PC used proxy  
11  
12 365 measures – total hospitalisations and YLL – which may not necessarily best reflect  
13  
14 366 effectiveness of PC. While our analyses extended to investigate variability in results if only  
15  
16 367 PPHs were included, these too have limitations in the context of this study. PPHs comprise <8%  
17  
18 368 of total hospitalisations and the communities in this study were mostly small, so monthly PPHs  
19  
20 369 rates in each remote community have the limitation of increased statistical instability, which may  
21  
22 370 explain the unexpected association between higher proportional use of agency-employed  
23  
24 371 nurses and lower costs. Secondly, comparison groups for costs and effects were somewhat  
25  
26 372 arbitrarily defined based on clinic-month rather than individual level data. It would have been  
27  
28 373 preferable to make comparisons on the basis of use of all agency nurses, not just of agency-  
29  
30 374 employed nurses. However, we were not able to accurately identify DOH-employed agency  
31  
32 375 nurses within the payroll data. Also, there were a small number of non-Aboriginal residents in  
33  
34 376 remote Aboriginal communities. Because the non-Aboriginal residents were predominantly  
35  
36 377 healthy workers, the impacts of non-Aboriginal residents on clinic-month health measures were  
37  
38 378 expected to be minimal. Thirdly, our cost estimates may also be imprecise, as they are  
39  
40 379 dependent on the quality of administrative data on expenditure recorded in GAS and on  
41  
42 380 consultation data recorded in PCIS. Fourthly, our study also did not include effects of any policy  
43  
44 381 measures designed to reduce staff turnover, nor did it attempt to measure the costs of  
45  
46 382 introducing such policies. While the findings of our study are likely generalisable to other  
47  
48 383 primary care clinics in remote, predominantly Aboriginal communities in Australia, caution is  
49  
50 384 advised in generalising beyond these limits. This is an observational study comparing two  
51  
52 385 different situations (higher vs lower turnover; higher vs lower proportional use of agency-  
53  
54  
55  
56  
57  
58  
59  
60

1  
2  
3 386 employed nurses) using existing administrative data. It is indicative of two simple workforce  
4  
5 387 policy scenarios in which cost-effectiveness information is otherwise lacking. No evidence  
6  
7 388 synthesis and decision modelling were undertaken in this study.  
8  
9

10 389 Despite its limitations, the findings of this research provide critically important evidence for  
11  
12 390 policymakers seeking to improve health outcomes for Aboriginal people living in remote  
13  
14 391 Australia while responsibly managing finite health budgets. There is great potential for more  
15  
16 392 cost-effective PC to be attained. This will require PC workforce turnover, retention, and use of  
17  
18 393 short-term agency-employed nurses to be addressed as a priority.  
19  
20

## 21 394 **Conclusion**

22  
23  
24 395 Higher turnover of government-employed nurses and AHPs is costly and associated with poorer  
25  
26 396 health outcomes for Aboriginal people. Halving the current annual turnover rate to 60% and  
27  
28 397 reducing use of agency-employed nurses has the potential to reduce costs to the NT health  
29  
30 398 system by \$32 million each year. Systemic investment in a range of co-ordinated workforce  
31  
32 399 strategies is needed to stabilise the remote workforce, save money, improve Aboriginal health  
33  
34 400 outcomes and 'close the gap'.  
35  
36  
37

38 401

## 40 402 **List of Abbreviations**

|        |      |                                 |
|--------|------|---------------------------------|
| 41 403 | AHPs | Aboriginal Health Practitioners |
| 42 404 | DOH  | Department of Health            |
| 43 405 | DRG  | Diagnosis-Related Group         |
| 44 406 | FTE  | Full-time Equivalent            |
| 45 407 | GAS  | Government Accounting System    |

46  
47  
48  
49  
50  
51  
52  
53  
54  
55  
56  
57

|    |     |      |                                           |
|----|-----|------|-------------------------------------------|
| 1  |     |      |                                           |
| 2  |     |      |                                           |
| 3  | 408 | HIA  | Hospital Inpatients Activity              |
| 4  |     |      |                                           |
| 5  |     |      |                                           |
| 6  | 409 | ICER | Incremental Cost-Effectiveness Ratio      |
| 7  |     |      |                                           |
| 8  | 410 | NT   | Northern Territory                        |
| 9  |     |      |                                           |
| 10 |     |      |                                           |
| 11 | 411 | PC   | Primary Care                              |
| 12 |     |      |                                           |
| 13 |     |      |                                           |
| 14 | 412 | PCIS | Primary Care Information Systems          |
| 15 |     |      |                                           |
| 16 | 413 | PIPS | Personnel Information and Payroll Systems |
| 17 |     |      |                                           |
| 18 |     |      |                                           |
| 19 | 414 | PPH  | Potentially Preventable Hospitalisation   |
| 20 |     |      |                                           |
| 21 | 415 | YLL  | Year of Life Lost                         |
| 22 |     |      |                                           |
| 23 |     |      |                                           |
| 24 | 416 |      |                                           |
| 25 |     |      |                                           |

## 417 **Declarations**

### 418 **Ethics approval**

419 Ethics approval was received from the Human Research Ethics Committee of the Northern  
420 Territory Department of Health and Menzies School of Health Research (2015-2363).

### 421 **Original protocol for the study**

422 The original protocol for the study is published and available (open access):

423 Wakerman J, Humphreys JS, Bourke L, Dunbar T, Jones M, Carey T, et al. Assessing the  
424 impact and cost of short-term health workforce in remote Indigenous communities in Australia: a  
425 mixed methods study protocol. *JMIR research protocols*. 2016;5(4):e135.

### 426 **Funding**

427 This work was supported by the Australian Research Council's *Discovery Projects* funding  
428 scheme (project number DP150102227). The funder had no input in to the design, conduct and  
429 reporting of this analysis.

### 430 **Competing interests**

1  
2  
3 431 The authors declare that they have no competing interests.  
4

5  
6 432 **Data sharing statement**

7 433 The datasets generated and analysed during the current study are not publicly available due to  
8  
9 434 identifiability of remote primary care providers and the need to protect their privacy.  
10

11  
12 435

13  
14 436 **Author contributions**

15  
16 437 YZ contributed to the design of the study and led analysis and drafting of the paper. JW  
17  
18 438 conceived and contributed to design of the overarching study and assisted with drafting the  
19  
20 439 paper. JSH contributed to the conceptualization and design of the study and assisted with  
21  
22 440 drafting the manuscript. MPJ, SG, MR and DJR contributed to the design of the study,  
23  
24 441 particularly the quantitative component, and provided comments on the manuscript. All authors  
25  
26 442 read and approved the final manuscript.  
27  
28

29  
30 443 **Acknowledgements**

31 444 The authors thank NT Department of Health staff who provided technical assistance in  
32  
33 445 accessing and interpreting Northern Territory (NT) Department of Health personnel, primary  
34  
35 446 care, hospitalisation and financial data. The authors also acknowledge and sincerely thank all  
36  
37 447 staff working in the 54 remote NT communities, particularly the clinic managers. Finally, the  
38  
39 448 authors would acknowledge the contributions of Terry Dunbar, Lisa Bourke, Lorna Murakami-  
40  
41 449 Gold, Tim Carey and David Lyle to the bigger overarching research project and for comments  
42  
43 450 that strengthened this manuscript.  
44  
45  
46  
47  
48  
49  
50  
51  
52  
53  
54  
55  
56  
57  
58  
59  
60

451 **References**

- 452
- 453 1. Australian Institute of Health and Welfare. The health and welfare of Australia's  
454 Aboriginal and Torres Strait Islander peoples 2015. Cat. no. IHW 147. Canberra: AIHW;  
455 2015.
- 456 2. Australian Institute of Health and Welfare. Australian Burden of Disease Study: fatal  
457 burden of disease in Aboriginal and Torres Strait Islander people 2010. Australian  
458 Burden of Disease Study series no. 2. Cat. no. BOD 2. Canberra: AIHW; 2015.
- 459 3. Zhao YJ, Guthridge S, Magnus A, Vos T. Burden of disease and injury in Aboriginal and  
460 non-Aboriginal populations in the Northern Territory. *Med J Aust.* 2004;180(10):498-502.
- 461 4. Vos T, Barker B, Begg S, et al. Burden of disease and injury in Aboriginal and Torres  
462 Strait Islander Peoples: the Indigenous health gap. *Int J Epidemiol.* 2009;38(2):470-7.
- 463 5. Zhao Y, Zhang X, Foley M, Guthridge S. Northern Territory burden of disease study:  
464 Fatal burden of disease and injury, 2004–2013. Darwin: NT Department of Health; 2016.
- 465 6. Australian Bureau of Statistics. Australian demographic statistics, June 2016. Cat no.  
466 3101.0. Canberra: ABS; 2016.
- 467 7. Council of Australian Governments. National indigenous reform agreement (Closing the  
468 Gap). Canberra: COAG; 2009.
- 469 8. Russell DJ, Zhao Y, Guthridge S, et al. Patterns of resident health workforce turnover  
470 and retention in remote communities of the Northern Territory of Australia, 2013–2015.  
471 *Hum Resour Health.* 2017;15(1):52.
- 472 9. Zhao Y, Russell DJ, Guthridge S, et al. Long-term trends in supply and sustainability of  
473 the health workforce in remote Aboriginal communities in the Northern Territory of  
474 Australia. *BMC Health Serv Res.* 2017;17(1):836.
- 475 10. Burns CB, Clough AR, Currie BJ, et al. Resource requirements to develop a large,  
476 remote aboriginal health service: whose responsibility? *Aust N Z J Public Health.*  
477 1998;22(1):133-9.
- 478 11. Garnett ST, Coe K, Golebiowska K, et al. Attracting and keeping nursing professionals in  
479 an environment of chronic labour shortage: A study of mobility among nurses and  
480 midwives in the Northern Territory of Australia. Darwin: Charles Darwin University Press;  
481 2008.
- 482 12. Anonymous. Nurse turnover rate down but continues to be high. *Aust Nurs J.*  
483 2009;16(7):10.
- 484 13. Anonymous. Nurses accept EBA. *Aust Nurs J.* 2009;16(7):10.
- 485 14. Zhao Y, Malyon R. Cost drivers of remote clinics: Remoteness and population size. *Aust*  
486 *Health Rev.* 2010;34(1):101-5.
- 487 15. Asthana S, Halliday J. What can rural agencies do to address the additional costs of  
488 rural services? A typology of rural service innovation. *Health Soc Care Community.*  
489 2004;12(6):457-65.
- 490 16. Zhao Y, Guthridge S, Ramjan M, et al. Cost impact of high staff turnover on primary care  
491 in remote Australia. *Aust Health Rev.* 2018;early online.

- 1  
2  
3 492 17. McGrath P, Holewa H, McGrath Z. Practical problems for Aboriginal palliative care  
4 493 service provision in rural and remote areas: equipment, power and travel issues.  
5 494 *Collegian*. 2007;14(3):21-6.
- 6  
7 495 18. NTG DOH. Remote Area Nurse safety: On-call after hours security. Darwin: NT  
8 496 Department of Health; 2016.
- 9  
10 497 19. Hayes LJ, O'Brien-Pallas L, Duffield C, et al. Nurse turnover: A literature review - An  
11 498 update. *Int J Nurs Stud*. 2012;49(7):887-905.
- 12 499 20. Russell DJ, Zhao Y, Guthridge S, et al. Patterns of Remote Area Nurse and Aboriginal  
13 500 Health Practitioner turnover and retention in remote communities of the Northern  
14 501 Territory of Australia, 2013-2015. *Human Resources for Health*. 2017;15:52.
- 15  
16 502 21. Northern Territory Government Department of Health. Indicator definition: Full Time  
17 503 Equivalents v1.0. Darwin: NTG Department of Health; 2015.
- 18  
19 504 22. Independent Hospital Pricing Authority. National hospital cost data collection: Northern  
20 505 Territory 2014/15 Round 19. Sydney: IHPA; 2016.
- 21 506 23. Zhao Y, Hanssens P, Byron P, Guthridge S. Cost estimates of primary health care  
22 507 activities for remote Aboriginal communities in the Northern Territory. Darwin: Northern  
23 508 Territory Department of Health and Community Services; 2006.
- 24  
25 509 24. Welfare AloHa. National Healthcare Agreement: PI 18—Selected potentially preventable  
26 510 hospitalisations, 2016. Canberra: AIHW; 2016.
- 27  
28 511 25. Australian Safety and Compensation Council. The health of nations: the value of a  
29 512 statistical life. Canberra: Commonwealth of Australia; 2008.
- 30 513 26. Buykx P, Humphreys J, Wakerman J, Pashen D. Systematic review of effective retention  
31 514 incentives for health workers in rural and remote areas: Towards evidence-based policy.  
32 515 *Aust J Rural Health*. 2010;18(3):102-9.
- 33  
34 516 27. Freeman T, Baum F, Lawless A, et al. Case Study of an Aboriginal Community-  
35 517 Controlled Health Service in Australia: Universal, Rights-Based, Publicly Funded  
36 518 Comprehensive Primary Health Care in Action. *Health Hum Rights*. 2016;18(2):93-108.
- 37 519 28. de Toca L. The world in East Arnhem. 14th National Rural Health Conference; Cairns,  
38 520 Australia: NRHA; 2017.
- 39  
40 521 29. Gomersall JS, Gibson O, Dwyer J, et al. What Indigenous Australian clients value about  
41 522 primary health care: a systematic review of qualitative evidence. *Aust N Z J Public*  
42 523 *Health*. 2017;41(4):417-23.

43 524

44 525

45 526

46 527

47 528

48 529

49 530

50 531

51 532

52 533

53 534

54 535

55 536

1  
2  
3 528  
4**Figure Titles**5  
6 529  
7 530

8  
9 531 **Figure 1. Cost-effectiveness plane comparing higher ( $\geq 10\%$ ) with lower ( $< 10\%$ ) monthly**  
10  
11 532 **turnover rates in remote clinics**

12  
13 533

14  
15 534 **Figure 2. Cost-effectiveness acceptability curve for comparing costs and effects in**  
16  
17 535 **savings in total health costs between higher ( $\geq 10\%$ ) and lower ( $< 10\%$ ) monthly nurse and**  
18  
19 536 **Aboriginal Health Practitioner turnover rates in remote clinics**

20  
21 537

22  
23  
24 538 **Figure 3. Cost-effectiveness plane comparing higher ( $\geq 10\%$ ) with lower ( $< 10\%$ )**  
25  
26 539 **proportional use of agency-employed nurses in remote clinics**

27  
28  
29 540

30  
31 541 **Figure 4. Acceptability curve for comparing costs and effects in terms of saving life-**  
32  
33 542 **years between higher ( $\geq 10\%$ ) and lower ( $< 10\%$ ) proportional use of agency nurses in**  
34  
35 543 **remote clinics**

36  
37  
38  
39 544  
40  
41  
42  
43  
44  
45  
46  
47  
48  
49  
50  
51  
52  
53  
54  
55  
56  
57  
58  
59  
60



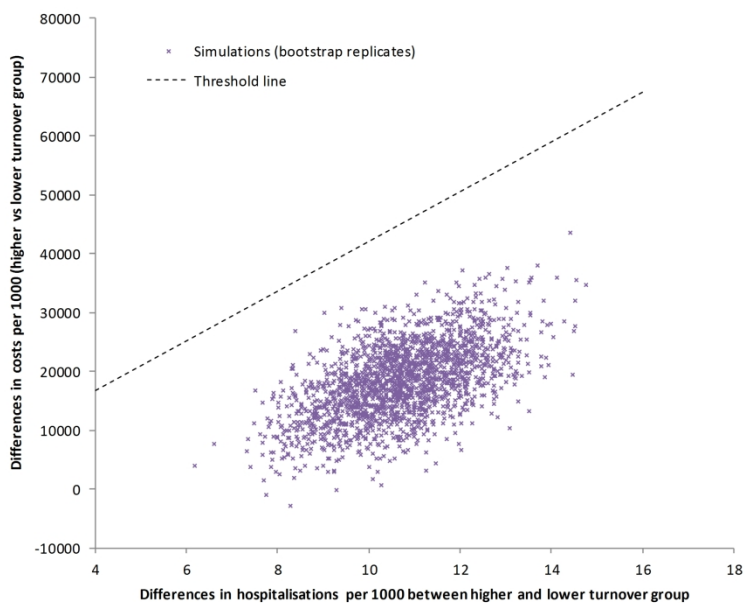

297x209mm (300 x 300 DPI)

1  
2  
3  
4  
5  
6  
7  
8  
9  
10  
11  
12  
13  
14  
15  
16  
17  
18  
19  
20  
21  
22  
23  
24  
25  
26  
27  
28  
29  
30  
31  
32  
33  
34  
35  
36  
37  
38  
39  
40  
41  
42  
43  
44  
45  
46  
47  
48  
49  
50  
51  
52  
53  
54  
55  
56  
57  
58  
59  
60

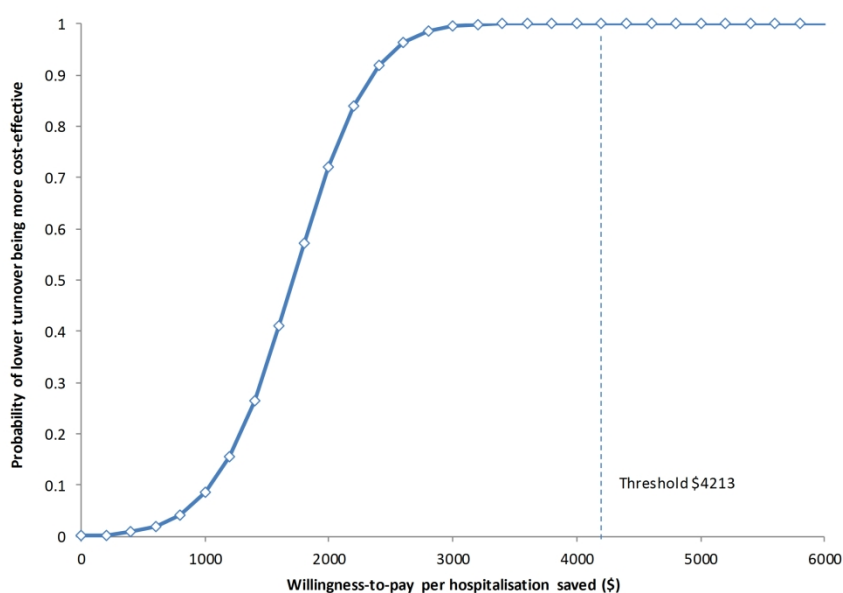

297x209mm (300 x 300 DPI)

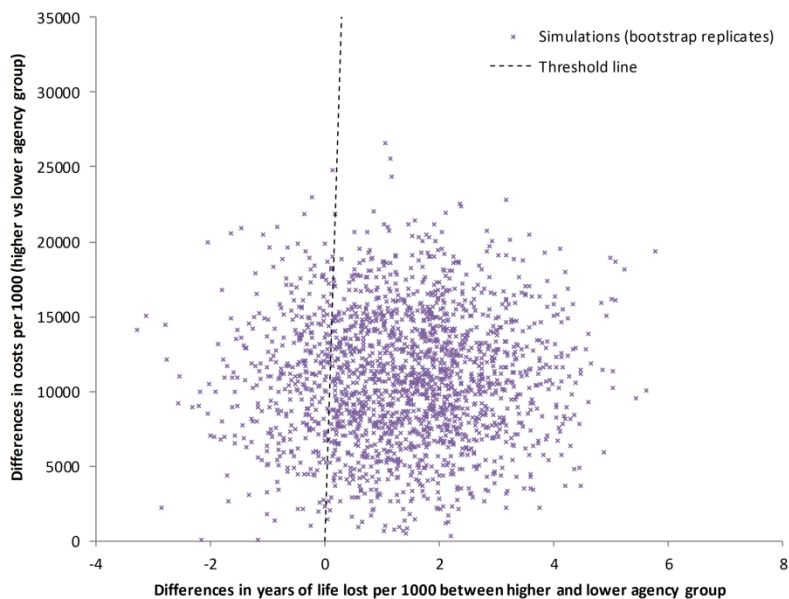

297x209mm (300 x 300 DPI)

1  
2  
3  
4  
5  
6  
7  
8  
9  
10  
11  
12  
13  
14  
15  
16  
17  
18  
19  
20  
21  
22  
23  
24  
25  
26  
27  
28  
29  
30  
31  
32  
33  
34  
35  
36  
37  
38  
39  
40  
41  
42  
43  
44  
45  
46  
47  
48  
49  
50  
51  
52  
53  
54  
55  
56  
57  
58  
59  
60

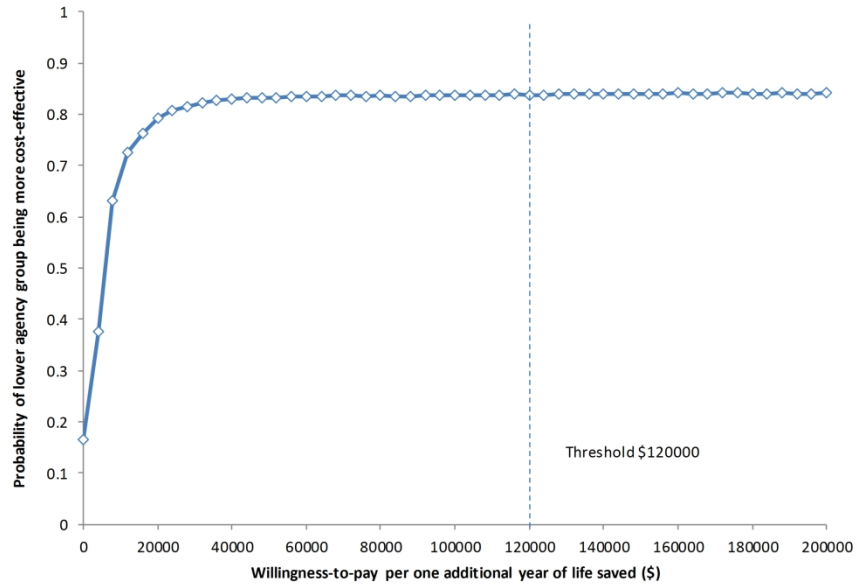

297x209mm (300 x 300 DPI)

## CHEERS checklist—Items to include when reporting economic evaluations of health interventions

| Section/item                                           | Item No | Recommendation                                                                                                                                                                                                                                                                                                               | Reported on page No/<br>line No                                                 |
|--------------------------------------------------------|---------|------------------------------------------------------------------------------------------------------------------------------------------------------------------------------------------------------------------------------------------------------------------------------------------------------------------------------|---------------------------------------------------------------------------------|
| <b>Title and abstract</b>                              |         |                                                                                                                                                                                                                                                                                                                              |                                                                                 |
| Title                                                  | 1       | Identify the study as an economic evaluation or use more specific terms such as “cost-effectiveness analysis”, and describe the interventions compared.                                                                                                                                                                      | page 1, line 1 to 2                                                             |
| Abstract                                               | 2       | Provide a structured summary of objectives, perspective, setting, methods (including study design and inputs), results (including base case and uncertainty analyses), and conclusions.                                                                                                                                      | page 1, line 4 to page 2, line 40                                               |
| <b>Introduction</b>                                    |         |                                                                                                                                                                                                                                                                                                                              |                                                                                 |
| Background and objectives                              | 3       | Provide an explicit statement of the broader context for the study.                                                                                                                                                                                                                                                          | page 3, line 61 to page 4, line 77                                              |
|                                                        |         | Present the study question and its relevance for health policy or practice decisions.                                                                                                                                                                                                                                        | page 4, line 78 to 85                                                           |
| <b>Methods</b>                                         |         |                                                                                                                                                                                                                                                                                                                              |                                                                                 |
| Target population and subgroups                        | 4       | Describe characteristics of the base case population and subgroups analysed, including why they were chosen.                                                                                                                                                                                                                 | page 4, line 87 to page 5, line 95;                                             |
| Setting and location                                   | 5       | State relevant aspects of the system(s) in which the decision(s) need(s) to be made.                                                                                                                                                                                                                                         | page 4, line 87 to page 5, line 95;                                             |
| Study perspective                                      | 6       | Describe the perspective of the study and relate this to the costs being evaluated.                                                                                                                                                                                                                                          | page 8, line 165 to 167                                                         |
| Comparators                                            | 7       | Describe the interventions or strategies being compared and state why they were chosen.                                                                                                                                                                                                                                      | Page 5, line 108 to 110; page 6, line 119 to 121; page 7, line 141 to line 144; |
| Time horizon                                           | 8       | State the time horizon(s) over which costs and consequences are being evaluated and say why appropriate.                                                                                                                                                                                                                     | page 5, line 102 to 103                                                         |
| Discount rate                                          | 9       | Report the choice of discount rate(s) used for costs and outcomes and say why appropriate.                                                                                                                                                                                                                                   | page 7, line 154 to 156                                                         |
| Choice of health outcomes                              | 10      | Describe what outcomes were used as the measure(s) of benefit in the evaluation and their relevance for the type of analysis performed.                                                                                                                                                                                      | page 7, lines 145 to 151                                                        |
| Measurement of effectiveness                           | 11a     | <i>Single study-based estimates</i> : Describe fully the design features of the single effectiveness study and why the single study was a sufficient source of clinical effectiveness data.                                                                                                                                  | page 5, line 99 to page 8, line 183; page 3 line 47 to 58                       |
|                                                        | 11b     | <i>Synthesis-based estimates</i> : Describe fully the methods used for identification of included studies and synthesis of clinical effectiveness data.                                                                                                                                                                      | Not applicable                                                                  |
| Measurement and valuation of preference based outcomes | 12      | If applicable, describe the population and methods used to elicit preferences for outcomes.                                                                                                                                                                                                                                  | Not applicable                                                                  |
| Estimating resources and costs                         | 13a     | <i>Single study-based economic evaluation</i> : Describe approaches used to estimate resource use associated with the alternative interventions. Describe primary or secondary research methods for valuing each resource item in terms of its unit cost. Describe any adjustments made to approximate to opportunity costs. | page 5, line 99 to page 8, line 183                                             |

| Section/item                                                         | Item No | Recommendation                                                                                                                                                                                                                                                                                                                                        | Reported on page No/<br>line No                                                                        |
|----------------------------------------------------------------------|---------|-------------------------------------------------------------------------------------------------------------------------------------------------------------------------------------------------------------------------------------------------------------------------------------------------------------------------------------------------------|--------------------------------------------------------------------------------------------------------|
|                                                                      | 13b     | <i>Model-based economic evaluation:</i> Describe approaches and data sources used to estimate resource use associated with model health states. Describe primary or secondary research methods for valuing each resource item in terms of its unit cost. Describe any adjustments made to approximate to opportunity costs.                           | Not applicable                                                                                         |
| Currency, price date, and conversion                                 | 14      | Report the dates of the estimated resource quantities and unit costs. Describe methods for adjusting estimated unit costs to the year of reported costs if necessary. Describe methods for converting costs into a common currency base and the exchange rate.                                                                                        | Page 5, line 102-103; page 5, line 111 to 113; page 7, line 154 to 156                                 |
| Choice of model                                                      | 15      | Describe and give reasons for the specific type of decision-analytical model used. Providing a figure to show model structure is strongly recommended.                                                                                                                                                                                                | page 14, line 293 to 294                                                                               |
| Assumptions                                                          | 16      | Describe all structural or other assumptions underpinning the decision-analytical model.                                                                                                                                                                                                                                                              | Not applicable                                                                                         |
| Analytical methods                                                   | 17      | Describe all analytical methods supporting the evaluation. This could include methods for dealing with skewed, missing, or censored data; extrapolation methods; methods for pooling data; approaches to validate or make adjustments (such as half cycle corrections) to a model; and methods for handling population heterogeneity and uncertainty. | page 6, line 141 to page 8, line 183                                                                   |
| <b>Results</b>                                                       |         |                                                                                                                                                                                                                                                                                                                                                       |                                                                                                        |
| Study parameters                                                     | 18      | Report the values, ranges, references, and, if used, probability distributions for all parameters. Report reasons or sources for distributions used to represent uncertainty where appropriate. Providing a table to show the input values is strongly recommended.                                                                                   | page 8, line 170 to 173; page 8, line 177 to 178; page 9, line 188 to 190                              |
| Incremental costs and outcomes                                       | 19      | For each intervention, report mean values for the main categories of estimated costs and outcomes of interest, as well as mean differences between the comparator groups. If applicable, report incremental cost-effectiveness ratios.                                                                                                                | page 9, line 192 to 194; page 10, Table 1; page 10, line 206 to 208; page 11, Table 2                  |
| Characterising uncertainty                                           | 20a     | <i>Single study-based economic evaluation:</i> Describe the effects of sampling uncertainty for the estimated incremental cost and incremental effectiveness parameters, together with the impact of methodological assumptions (such as discount rate, study perspective).                                                                           | Page 9, line 195 to 199; page 10, line 212 to 215; Figures 1 to 4; page 10, Table 1; page 11, Table 2. |
|                                                                      | 20b     | <i>Model-based economic evaluation:</i> Describe the effects on the results of uncertainty for all input parameters, and uncertainty related to the structure of the model and assumptions.                                                                                                                                                           | Not applicable                                                                                         |
| Characterising heterogeneity                                         | 21      | If applicable, report differences in costs, outcomes, or cost-effectiveness that can be explained by variations between subgroups of patients with different baseline characteristics or other observed variability in effects that are not reducible by more information.                                                                            | Not applicable                                                                                         |
| <b>Discussion</b>                                                    |         |                                                                                                                                                                                                                                                                                                                                                       |                                                                                                        |
| Study findings, limitations, generalisability, and current knowledge | 22      | Summarise key study findings and describe how they support the conclusions reached. Discuss limitations and the generalisability of the findings and how the findings fit with current knowledge.                                                                                                                                                     | page 12, line 238 to page 15, line 299                                                                 |

| Section/item          | Item No | Recommendation                                                                                                                                                                                                                                    | Reported on page No/<br>line No          |
|-----------------------|---------|---------------------------------------------------------------------------------------------------------------------------------------------------------------------------------------------------------------------------------------------------|------------------------------------------|
| <b>Other</b>          |         |                                                                                                                                                                                                                                                   |                                          |
| Source of funding     | 23      | Describe how the study was funded and the role of the funder in the identification, design, conduct, and reporting of the analysis. Describe other non-monetary sources of support.                                                               | page 16, line 332 to<br>page 16 line 335 |
| Conflicts of interest | 24      | Describe any potential for conflict of interest of study contributors in accordance with journal policy. In the absence of a journal policy, we recommend authors comply with International Committee of Medical Journal Editors recommendations. | page 16, line 336 to<br>337              |

For consistency, the CHEERS statement checklist format is based on the format of the CONSORT statement checklist
